1 **From emergence to endemicity: highly pathogenic H5 avian influenza viruses in Taiwan**

2

3 **Authors:**

4 Yao-Tsun Li<sup>1\*</sup>, Hui-Ying Ko<sup>2</sup>, Joseph Hughes<sup>3</sup>, Ming-Tsan Liu<sup>4</sup>, Yi-Ling Lin<sup>2,5</sup>, Katie Hampson<sup>1</sup>,

5 Kirstyn Brunker<sup>1\*</sup>

6

7 **Affiliations:**

8 1. School of Biodiversity, One Health & Veterinary Medicine, University of Glasgow,

9 Glasgow, UK

10 2. Institute of Biomedical Sciences, Academia Sinica, Taipei, Taiwan

11 3. MRC-University of Glasgow Centre for Virus Research, Glasgow, UK

12 4. Center for Research, Diagnostic and Vaccine Development, Centers for Disease Control,

13 Ministry of Health and Welfare, Taipei, Taiwan

14 5. Biomedical Translation Research Center, Academia Sinica, Taipei, Taiwan

15

16 **\*Corresponding authors:**

17 Yao-Tsun Li [Yao-Tsun.Li@glasgow.ac.uk](mailto:Yao-Tsun.Li@glasgow.ac.uk)

18 Kirstyn Brunker [Kirstyn.Brunker@glasgow.ac.uk](mailto:Kirstyn.Brunker@glasgow.ac.uk)

19 University of Glasgow, Glasgow G12 8QQ, UK

20

21

22

23

24 **Author contributions:** Conceptualisation: YTL, HYK. Formal analysis: YTL. Methodology: YTL, JH.  
25 Resources: HYK, YLL. Writing - original draft preparation: YTL. Writing - review & editing: YTL,  
26 HYK, JH, MTL, YLL, KH, KB. Supervision: JH, KH, KB. Funding: KH, KB.

27

28 **Data accessibility statement:** The custom codes used in analyses, and the XML files required for BEAST  
29 can be found at <https://github.com/yaotli/endemic>. The accession numbers of the Taiwan sequences  
30 analysed in our study are listed in Supplementary Table 2.

31

32 **Keywords:** avian influenza, endemic, zoonotic

33

34

35

36

37

38

39

40

41

42

43

44

45

46

47 **Abstract**

48 A/goose/Guangdong/1/96-like (GsGd) highly pathogenic avian influenza (HPAI) H5 viruses cause severe  
49 outbreaks in poultry when introduced. Since emergence in 1996, control measures in most countries have  
50 suppressed local GsGd transmission following introductions, making persistent transmission in domestic  
51 birds rare. However, geographical expansion of clade 2.3.4.4 sublineages has raised concern about  
52 establishment of endemic circulation, while mechanistic drivers leading to endemicity remain unknown.  
53 We reconstructed the evolutionary history of GsGd sublineage, clade 2.3.4.4c, in Taiwan using a time-  
54 heterogeneous rate phylogeographic model. During Taiwan's initial epidemic wave (January 2015 -  
55 August 2016), we inferred that localised outbreaks had multiple origins from rapid spread between  
56 counties/cities nationwide. Subsequently, outbreaks predominantly originated from a single county,  
57 Yunlin, where persistent transmission harbours the trunk viruses of the sublineage. Endemic hotspots  
58 determined by phylogeographic reconstruction largely predicted the locations of re-emerging outbreaks  
59 in Yunlin. The transition to endemicity involved a shift to chicken-dominant circulation, following the  
60 initial bidirectional spread between chicken and domestic waterfowl. Our results suggest that following  
61 their emergence in Taiwan, source-sink dynamics from a single county have maintained GsGd endemicity,  
62 pointing to where control efforts should be targeted to eliminate the disease.

63

64

65

66

67

## 68 **Introduction**

69 Preventing emerging zoonotic viruses from establishing endemic circulation is essential to public health,  
70 considering the great health burden caused by endemic zoonoses globally<sup>1</sup>. An example of particular  
71 concern is the A/Goose/Guangdong/96-like (GsGd) H5 viruses, a lineage of highly pathogenic avian  
72 influenza (HPAI) first identified in southern China. From 2003-2006 HPAI GsGd viruses spread globally,  
73 infecting poultry in countries across Asia and Europe<sup>2</sup>. Most countries have subsequently eliminated HPAI  
74 GsGd viruses<sup>3,4</sup>, but, since 2010, a few countries, including Bangladesh, China, India, Indonesia, and  
75 Vietnam, have been classified as endemic, due to continued circulation in poultry and sporadic human  
76 cases<sup>5</sup>. Although there has been extensive characterisation of the genetic origins and the migration routes  
77 of HPAI GsGd viruses<sup>6-8</sup>, the mechanisms facilitating persistence and the transition to endemicity remain  
78 unknown.

79  
80 Since emergence GsGd viruses have undergone diversification by accumulating mutations in their  
81 surface protein hemagglutinin (HA), resulting in multiple antigenically distinct sublineages, termed  
82 clades<sup>2,3</sup>. These genetic changes can alter host preferences, determining the virus' reservoir, dissemination  
83 and persistence<sup>9</sup>. GsGd viruses of the clade 2.3.4.4, including clade 2.3.4.4a-2.3.4.4h, are distinguished  
84 from previous GsGd viruses by various neuraminidase (NA) subtypes (N2, N5, N6 and N8) besides N1,  
85 and have rapidly increased in the global population since 2014<sup>10,11</sup>. These "H5Nx" viruses have caused  
86 poultry and wild animal outbreaks in previously unaffected regions, such as the Americas<sup>10,12</sup>, and have  
87 also demonstrated unexpected transmission from Europe back to China<sup>13</sup>. Moreover, the viruses have led  
88 to mammal-to-mammal transmission in minks and cows<sup>14,15</sup>. The increasingly sustained circulation in  
89 areas previously thought to be sinks raises concerns about expanding establishment of endemic  
90 circulation<sup>16</sup>.

91

92           The clade 2.3.4.4c virus, one of the H5Nx sublineages, caused severe outbreaks in Korean poultry  
93 farms in early 2014<sup>10,17</sup>. Following migratory bird flyways, the virus spread to Japan, the USA and Taiwan  
94 by the end of that year<sup>18-20</sup>. In 2015, Taiwan experienced a devastating epidemic in domestic birds and  
95 culled over 5 million birds to curb localised outbreaks<sup>21</sup>. This marked the first significant transmission of  
96 HPAI GsGd viruses in the country<sup>22,23</sup>. While clade 2.3.4.4c viruses were eliminated in other countries  
97 before 2017<sup>11,20</sup>, the virus continued to circulate as H5N2 subtype in Taiwan until at least 2019<sup>20,24</sup>. With  
98 multiple genotypes generated by reassortment with local low pathogenic avian influenza (LPAI)  
99 viruses<sup>20,23</sup>, the HPAI clade 2.3.4.4c virus in Taiwan has been recognized as circulating endemically<sup>21</sup>.  
100 How this clade dispersed in Taiwan and the factors underlying its endemic establishment are not  
101 understood.

102

103           In this study, we quantified the persistence of GsGd outbreaks globally using virus HA genes, and  
104 identified the source of the endemic clade that established in Taiwan within this global context. We then  
105 curated the HA genes of the clade 2.3.4.4c virus in Taiwan, isolated from January 2015 to March 2019,  
106 representing approximately 20% of outbreaks that occurred within the country. Using this data set, we  
107 performed time-heterogeneous phylogeographic analyses to reconstruct the geographical and ecological  
108 dispersal dynamics of the clade as it transitioned from emergence to endemism. Specifically, we elucidate  
109 the factors facilitating viral spread among counties/cities in Taiwan following the first epidemic wave in  
110 2015.

111

## 112 **Results**

113 Global persistence of GsGd

114 To better understand local epidemics following GsGd introductions on a global scale, we identified  
115 descendent sublineages. We found about 400 sublineages from a uniformly downsampled dataset using  
116 the H5 genes of GsGd viruses up to September 2022 (Figure 1). These GsGd sublineages circulated across  
117 78 countries, but their circulation was generally short-lived, with an average duration of 0.6 years based  
118 on the date of sample collection. Closer examination of sublineages that persisted for more than three  
119 years (based on a 95% quantile of 2.64), revealed 15 persistent sublineages in Southeast Asia, South Asia  
120 and the Middle East, including the clade 2.3.4.4c virus in Taiwan (Figure 1). Geographical reconstruction  
121 informed by outbreak reports supported this finding that most introductions had limited onward  
122 transmission (on average, 0.61 years) and identified the same countries with prolonged viral circulation  
123 (data not shown).

124

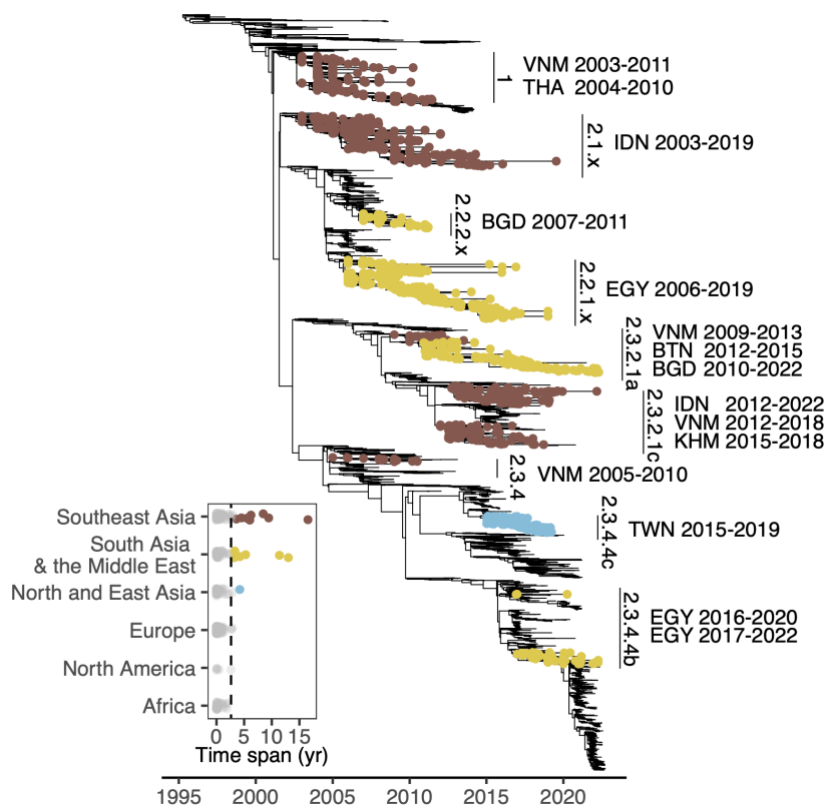

125

126

127 **Figure 1. The duration of GsGd outbreak lineages.** The time-scaled phylogenetic tree inferred with HA  
128 genes highlights fifteen lineages, which persistently circulated for at least three years. These are labelled  
129 with H5 nomenclature classification, country of isolation and duration. The inset shows the lineage  
130 duration classified by geographical area, with persistent sublineages highlighted as tips on the phylogeny.  
131 The dashed line denotes 95% quantile. VNM, Vietnam; THA, Thailand; IDN, Indonesia; BGD,  
132 Bangladesh; EGY, Egypt; BTN, Bhutan; KHM, Cambodia; TWN, Taiwan.

133

134 The emergence and spread of clade 2.3.4.4c in Taiwan

135 In January 2015, over 600 outbreaks of clade 2.3.4.4c were reported in Taiwan across 10 counties/cities  
136 (Figure 2A). Subsequently, reported HPAI outbreaks in Taiwan declined and became sporadic in  
137 previously affected areas, with only three cases reported during July-August 2016, before transmission  
138 resumed in winter 2016-2017 (Figure 2B). To understand the spread of the clade 2.3.4.4c virus in Taiwan,  
139 we curated a genetic data set of viral HA sequences. The sequences are distributed over time from January  
140 2015 to March 2019, and their sample sizes per county/city correlate well with the numbers of reported  
141 outbreaks (Figure 2D).

142

143

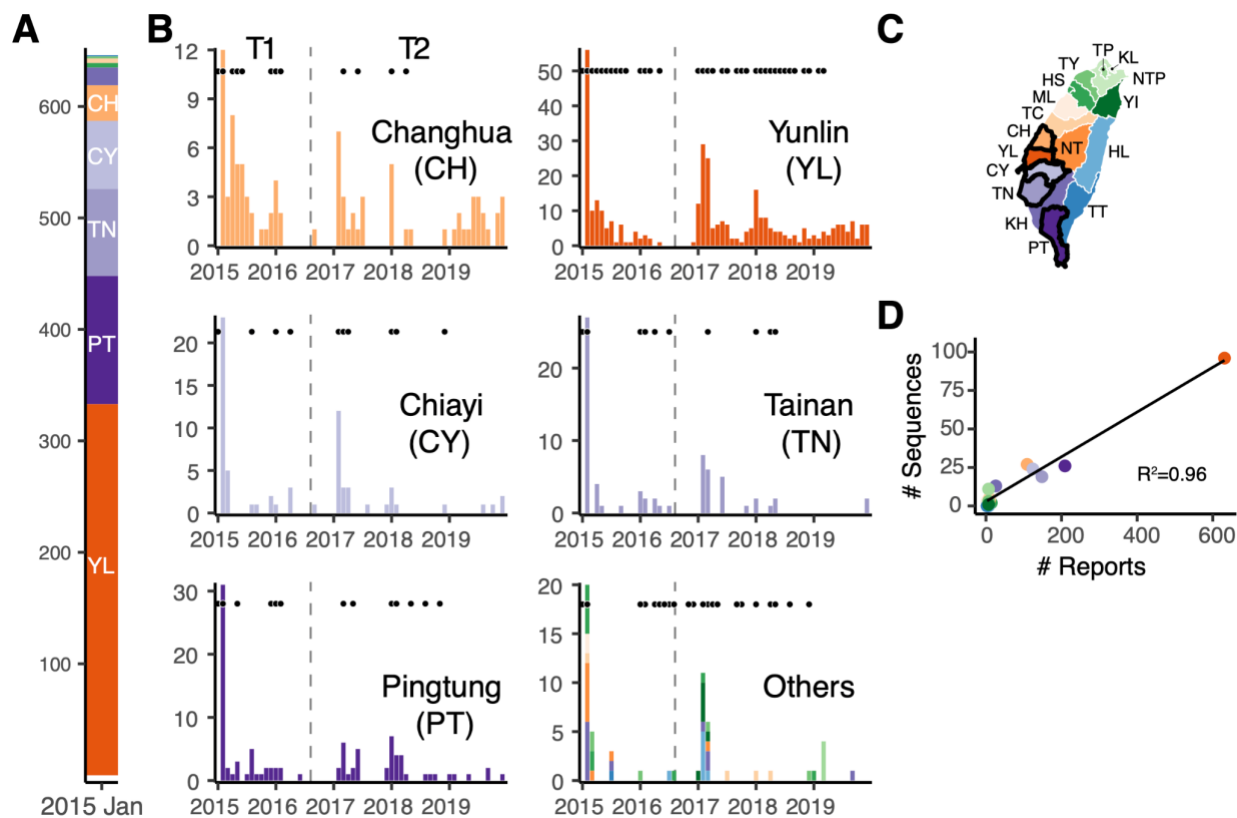

144

145

146 **Figure 2. The emergence of HPAI GsGd clade 2.3.4.4c in Taiwan and subsequent circulation from**

147 **2015-2019. (A and B) The number of reports of infected poultry in farms or abandoned carcasses. The**

148 **January 2015 numbers are pooled in panel A, while the monthly numbers of reports are presented by**

149 **location in panel B. Black dots above the bars indicate the availability of genomic data in the**

150 **corresponding months. The dashed vertical lines indicate the start of September 2016, the transition from**

151 **the emergence (T1) to the endemic phase (T2). (C) The map highlights the five counties/cities with the**

152 **most reports. (D) The correlation between reported outbreaks and available sequences for each of the 14**

153 **counties/cities. The points are coloured using the same colour scheme as the map and the other panels.**

154 **NTP, New Taipei; TP, Taipei; KL, Keelung; TY, Taoyuan; HS, Hsinchu; YI, Yilan; ML, Miaoli; TC,**

155 **Taichung; CH, Changhua; NT, Nantou; YL, Yunlin; CY, Chiayi; TN, Tainan; KH, Kaohsiung; PT,**

156 **Pingtung; HL, Hualien; TT, Taitung.**



157

158 To understand the dispersal dynamics of the 2.3.4.4c clade in Taiwan, we reconstructed the viral  
159 spread using continuous phylogeographical approaches which inferred the spatial locations of nodes. The  
160 Bayesian MCMC sampling process used priors informed by surveillance data to specify the locations of  
161 viruses (see Methods). The results, stratified by year, indicate that in 2015 there was intensive virus  
162 dispersal within and between western counties/cities (CH, YL, CY and TN), as well as more limited  
163 dispersal in southern counties/cities (KH and PT)(Figure 3). Long-distance dispersal events mostly  
164 originated from the main cluster in the west, and the northward dispersal events did not appear to seed  
165 sustained outbreaks. Since 2016, the number of dispersal events has significantly decreased and since  
166 2017 Yunlin County (YL) has become the primary source of both short- and long-distance spread (Figure  
167 3). The pattern is further illustrated by discretizing the inferred locations, with diffusion within YL  
168 dominating in all directions (Supplementary Figure 1).

169

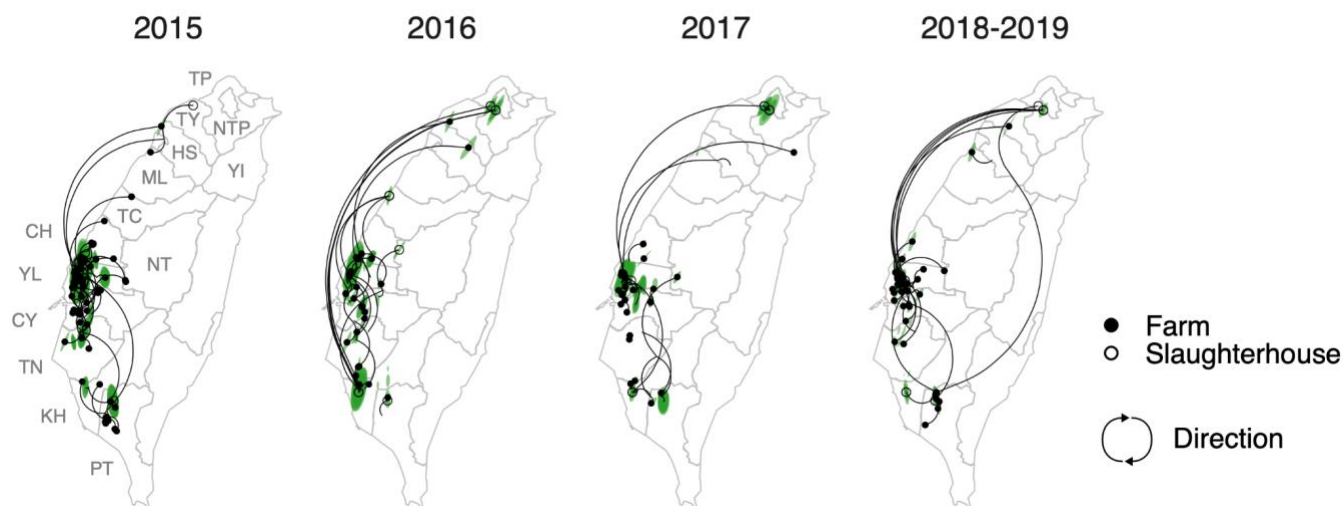

170

171 **Figure 3. Reconstruction of the dispersal of clade 2.3.4.4c in Taiwan, 2015-2019.** The points on the  
172 maps indicate the location of the virus samples, while the coloured areas represent the 80% HPD (highest  
173 posterior density) of the nodes inferred by the continuous phylogeography. Curves represent the branches

174 of the maximum clade credibility (MCC) tree and are categorised into four periods based on the timing of  
175 parental nodes. Dispersal direction (clockwise) of the viral lineage is indicated by the curvature.

176

177 Use of explicit phylogeographic methods can reduce sampling biases<sup>25,26</sup>. Here, the locations of  
178 samples from slaughterhouses or rendering factories introduced inaccuracies into our inference. This is  
179 because these locations were unlikely to be the origins of viral spread, particularly those from the northern  
180 cities (e.g. TP and NTP) where agricultural activity is minimal (Supplementary Figure 2). To reconstruct  
181 the dispersal history of the virus, we therefore used discrete diffusion methods to reassign the locations of  
182 slaughterhouse samples. Specifically, we employed priors informed by the surveillance data, which  
183 represented possible sources of animals transported to slaughterhouses or rendering factories  
184 (Supplementary Figure 3B). Additionally, we used a heterogeneous rate model to identify changes in  
185 dispersal patterns between two epidemiological phases defined from the surveillance data (Figure 2): from  
186 January 2015 to August 2016 (T1) and from September 2016 onwards (T2).

187

188 The statistically supported routes that we inferred indicate a shift in dispersal from outbreaks  
189 having multiple sources to predominantly originating from a single source (Figure 4 and Supplementary  
190 Figure 4A), and are generally consistent with inference from the continuous phylogeographic analyses.  
191 During the emergence phase (T1), substantial transition events were detected between two western  
192 counties (YL and CH), in addition to dispersal from YL to nearby counties, with less frequent transitions  
193 identified from CH and PT to neighbouring counties/cities. In contrast, during the transition to endemicity  
194 (T2), all supported routes originated from YL, except for a less frequent path from PT. To account for  
195 local transmission, we quantified the maximum time interval assembled by branches with the same  
196 inferred state (Figure 4 and Supplementary Figure 5A). YL appears to be the only site where viruses

197 persisted for more than 75% of both time periods (T1 and T2), suggesting its potential as a source of virus  
198 spread. Furthermore, when considering the viruses leading to the most recent isolates, CH harboured the  
199 “trunk” of the clade in 2015, but since 2016, YL has consistently been the major site harbouring viruses  
200 leading to the most distant progeny (Supplementary Figure 6A). These results suggest that YL has become  
201 the most prominent origin for nationwide dispersal following the initial epidemic wave. In contrast,  
202 circulation in other locations, particularly CH, has been largely suppressed, preventing spread to other  
203 counties/cities.

204

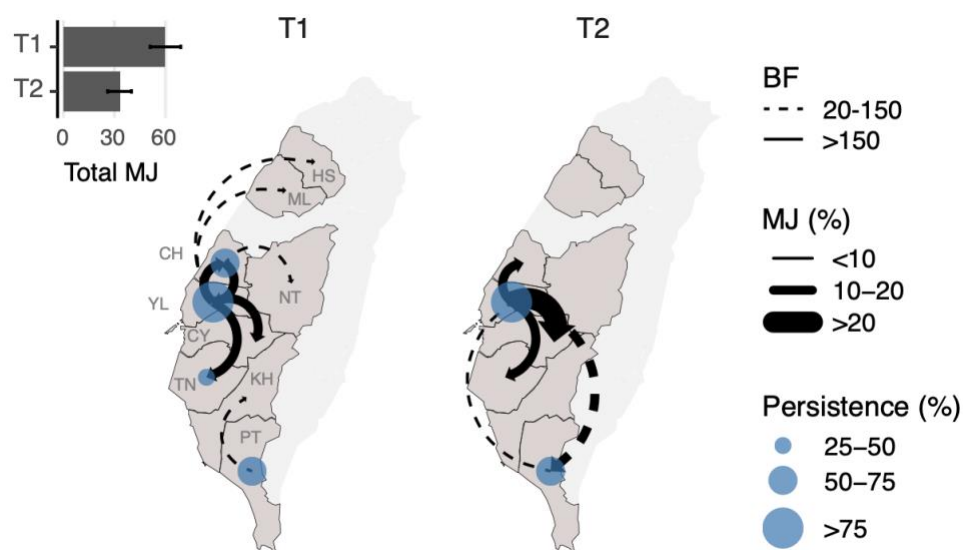

205

206

207 **Figure 4. Schematic illustration of the main diffusion routes of the Taiwan clade 2.3.4.4c virus**  
208 **during the first epidemic wave and subsequent transition to endemicity.** The statistically supported  
209 directions between counties/cities (Bayes factor>20) inferred by the discrete phylogenetic analyses are  
210 indicated as curves with arrows. The different line types reflect the strength of support (BF). The thickness  
211 of the curve reflects the frequency of transition events, presented as the proportion of total Markov jumps  
212 in the time period (T1 or T2). Total Markov jumps are indicated on the upper left inset. The size of the

213 blue circles reflects the degree of persistence, calculated by unifying phylogeny branches with both nodes  
214 inferred as the same geographical area divided by the T1/T2 time period. Only areas where viruses  
215 circulated for more than 25% of the period are labelled. T1, January 2015 to August 2016; T2, September  
216 2016 to March 2019.

217

218 To investigate the impact of sampling, we created two subsampled data sets by downsampling  
219 genetic sequences from county YL, resulting in YL no longer being the most frequently sampled site in  
220 each dataset. The subsampled data showed a shift in the origins of viral diffusion to CH or TN during the  
221 emergence phase (T1), but the inferred routes during the endemic phase (T2) were almost identical to  
222 those obtained using the full dataset (Supplementary Figure 4B and 4C). Similarly, persistence quantified  
223 from subsampling shows that CH replaced YL as the location with the most persistent circulation during  
224 the initial epidemic wave (T1). However, the estimates during the endemic phase (T2) were largely  
225 unaffected by the targeted subsampling (Supplementary Figure 5B and 5C).

226

227 To understand how the surveillance data may have biased our inference, we also performed the  
228 same phylogeographic approaches based on the original collection county/city, with unknown samples  
229 assigned an uninformative prior containing all collection locations. This inference, which is independent  
230 of outbreak records, reveals a more widespread distribution of dispersal origins during the initial epidemic  
231 wave (T1). In addition to PT, more southern locations (i.e. TN and KH) were also identified as dispersal  
232 origins (Supplementary Figure 4D). During the endemic phase (T2), the pattern is consistent with the  
233 results obtained from considering the outbreak records. Notable differences were found in routes involving  
234 locations where samples were mainly from slaughterhouses or rendering factories (i.e. NTP and TP,  
235 Supplementary Figure 4D). Estimates of persistence based on record-independent priors (Supplementary

236 Figure 5D) and all trunk probability conditions tested (Supplementary Figure 6B-D) indicate similar  
237 results to the full data set. Taken together, these findings suggest that our observation of nationwide  
238 geographical spread is robust to both sampling and state assignment.

239

240 Location-specific factors drive the risk of viral dispersal

241 To identify the risk factors that facilitated the spread of clade 2.3.4.4c in Taiwan, we implemented a  
242 Generalised Linear Model (GLM) model accommodated by the time-heterogeneous discrete  
243 phylogeographic method. This allowed for estimates of predictor effect size and inclusion probability by  
244 time period. The results show that sample size is positively and significantly correlated with diffusion  
245 during the initial epidemic wave (T1, Figure 5A, RandEffect-). The number of poultry farms has a  
246 prominent inclusion probability during the endemic phase (T2), but this was not statistically significant.  
247 To account for location-specific factors, the GLM model was adjusted by adding random effects for each  
248 site, in addition to the existing predictors. The new model reduced the effects of sample size, and no further  
249 predictors were identified (Figure 5A, RandEffect+). Interestingly, the result shows that dispersal routes  
250 to high incidence counties/cities (CH, YL, CY and TN), and the direction from YL, have significant  
251 positive effects (Figure 5B). To avoid overparameterization, we conducted GLM estimations with only  
252 one of the predictors that had higher inclusion probabilities and sample size. Consistent with the full  
253 model, the reduced models that include predictors for either poultry farm, road distance, or cropland show  
254 no significant effects for these factors (Supplementary Figure 7). Furthermore, the random effects that  
255 specify directions to YL, CY, or TN are significant in all three reduced models, while the effect of the  
256 direction from YL is significant in one reduced model. The results remained consistent when the full  
257 model was examined in a time-homogeneous manner (Supplementary Figure 8). These findings suggest

258 that location-specific factors are more likely to explain the spatial spread of the virus in Taiwan than  
 259 shared agricultural risk factors.

260

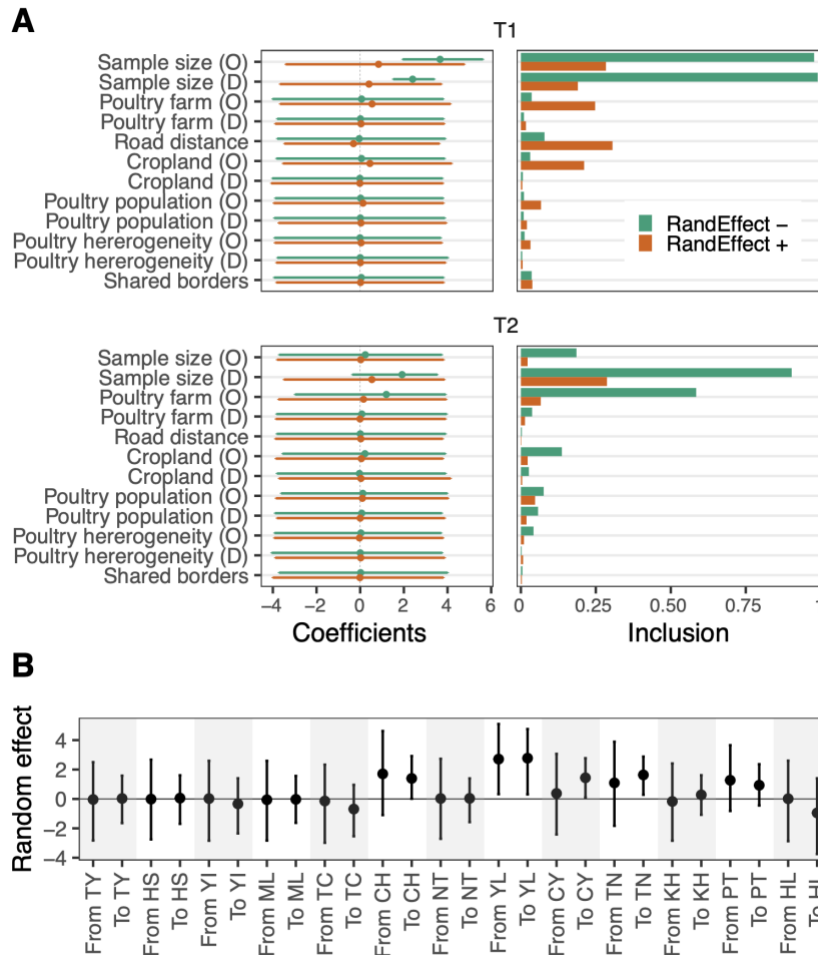

261

262

263 **Figure 5. Potential predictors of dispersal of clade 2.3.4.4c virus between counties/cities in Taiwan.**

264 (A) The conditional effect sizes quantified by coefficients (left) and the inclusion probabilities of  
 265 predictors (right) estimated by the time-heterogeneous phylogenetic generalised linear model (GLM).

266 Results of the models with and without random effect variables are shown. The predictor names are

267 denoted by O in parentheses for origin and D for destination. (B) Location-specific random effects in the

268 GLM model. The effect sizes are in log space and are presented as mean with 95% HPD interval.

269

270 Most YL outbreaks re-emerge from endemic hotspots

271 The phylogeographic results suggest a pivotal role of YL county in driving outbreaks across the country.

272 However, the determinants that distinguish YL county from other locations remain unclear. To

273 investigate this, we evaluated re-emerging HPAI outbreaks in the persistent foci during the endemic phase

274 (T2). Based on the practice of establishing surveillance zones after case identification<sup>21,27</sup>, hotspots were

275 defined by overlapping buffer areas within 1 km of node locations inferred by the continuous

276 phylogeographic methods, or within the same distance of the node plus outbreak locations (Figure 6A).

277 When mapping new outbreaks in YL from 2019 to 2022, over 50% of these occurred within the

278 phylogenetically-defined hotspots. Moreover, over 70% of the outbreaks were found in the hotspots

279 defined by the phylogenies supplemented with contemporary outbreak sites (Figure 6B). The areas defined

280 by both methods account for less than 20% of the area of YL (Supplementary Figure 9). When the buffer

281 radius was set to 0.5 km, over 30% and 60% of the new outbreaks were still identified within the hotspots

282 defined by the two methods, accounting for less than 10% of the county's area (Supplementary Figure 9).

283 When the approach is applied to four other high incidence areas in Taiwan (Figure 2B), YL shows

284 significantly higher percentages of recurrence in the hotspots defined by the two buffer distances (Figure

285 6C). These findings suggest that the inability to interrupt transmission within the county has led to the

286 development of an endemic focus of persistent viral circulation in YL.

287

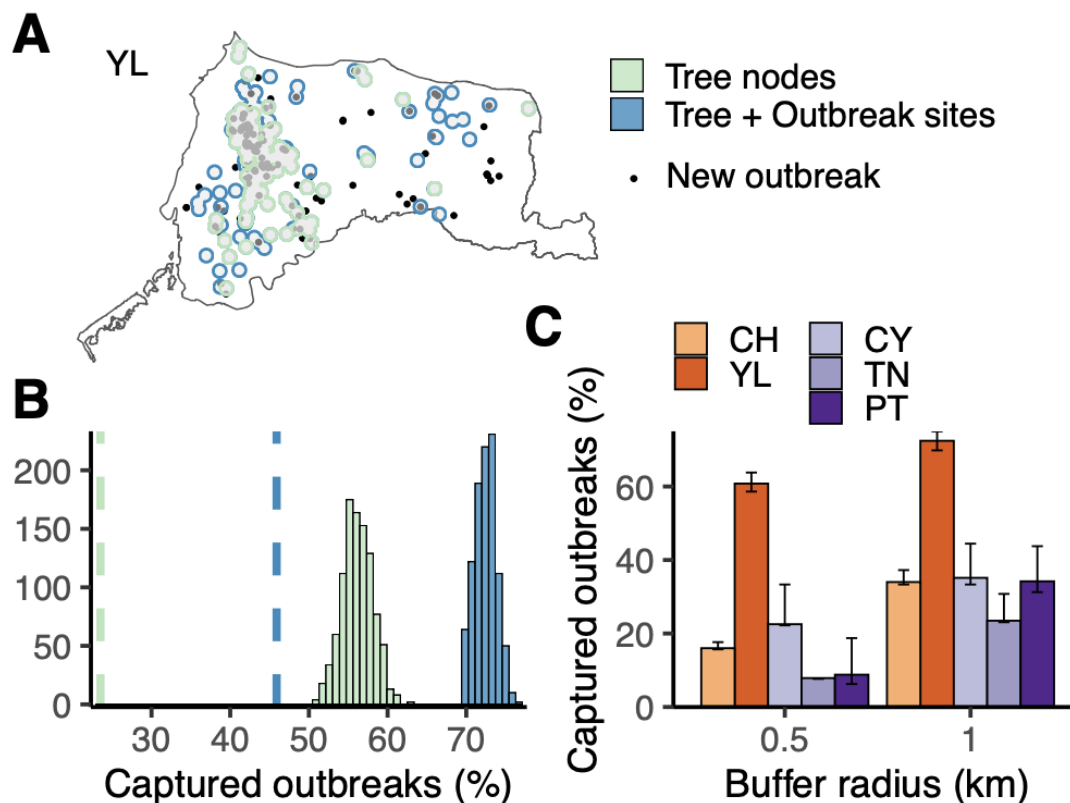

288

289 **Figure 6. Evaluating the spatial distribution of re-emergent H5 HPAI outbreaks in Yunlin county**

290 **(YL).** (A) An example from a randomly selected posterior tree. The black points indicate reported

291 outbreak sites that occurred between 2019 and 2022, after the latest available genetic data. The green/blue

292 areas created by merged buffers indicate the inferred hotspots. (B) Distributions of captured new outbreaks

293 by inferred epidemic hotspots based on 1 km-buffers with centres of nodes only (green) or nodes plus

294 outbreak sites (blue). The vertical dashed lines indicate the mean of randomly generated circulating areas

295 with identical buffer numbers as tree nodes (green) or tree nodes plus outbreak sites (blue). (C) Comparing

296 the re-emergence of outbreaks within inferred hotspots in different locations. Proportions of captured

297 outbreaks were calculated with buffers of two radius distances. Error bars indicate 95% credible intervals.

298

299 Development of chicken-dominant circulation



300 The initial 2015 epidemic wave in Taiwan was characterised by widespread transmission in farms rearing  
301 domestic waterfowl<sup>28</sup>. This corresponded to a higher proportion of outbreaks and viral samples attributed  
302 to ducks or geese compared to chickens in 2015 (Figure 7B and Supplementary Figure 3A). To assess  
303 transmission between poultry species, we applied similar phylogeographic methods to the same genetic  
304 data, classified into Anseriformes (duck and goose) or Galliformes (chicken, turkey and quail) species.  
305 The inferred diffusion indicates that transmission between the two host groups was bidirectional during  
306 the initial epidemic wave (T1), with 80% of transmission attributed to spread from waterfowl, while both  
307 routes were statistically supported (Figure 7A). During the endemic phase (T2), transmission shifted to  
308 gallinaceous birds, while the transmission route from waterfowl was not supported (Figure 7A). This  
309 finding was further confirmed by an NA data set containing cognate N2 genes of Taiwan clade 2.3.4.4c  
310 viruses (Supplementary Figure 10). The trunk analyses show that the terrestrial poultry has maintained  
311 the gene source of the lineage since its introduction (Figure 7C). These results suggest that terrestrial  
312 poultry, mainly chickens, served as reservoir for the clade 2.3.4.4c virus during the endemic phase (T2),  
313 following the first epidemic wave during which inter-host group transmission dominated and more likely  
314 originated from domestic waterfowl.

315

316 By detecting signals of positive selection, we assessed the evidence for host adaptation. The dN/dS  
317 (w) estimate of HA (H5) genes in Taiwan clade 2.3.4.4c viruses is similar to that of HA genes in a North  
318 American H5N2 lineage introduced to the Taiwanese chicken population as early as 2003<sup>20,29</sup>, while the  
319 estimate of NA (N2) genes in the clade 2.3.4.4c viruses is higher than that of the North American lineage  
320 (Supplementary Table 1). In addition, there are less than five positively selected sites detected in both HA  
321 and NA of clade 2.3.4.4c in Taiwan, which is comparable to the results found in the North American  
322 H5N2 lineage. Note that all of the substitutions occurring at these sites were not fixed in the samples

323 collected in 2019 (Supplementary Table 1). These results do not support selection pressure from host  
 324 adaptation during the transition to endemicity and establishment of chicken-dominant circulation.  
 325

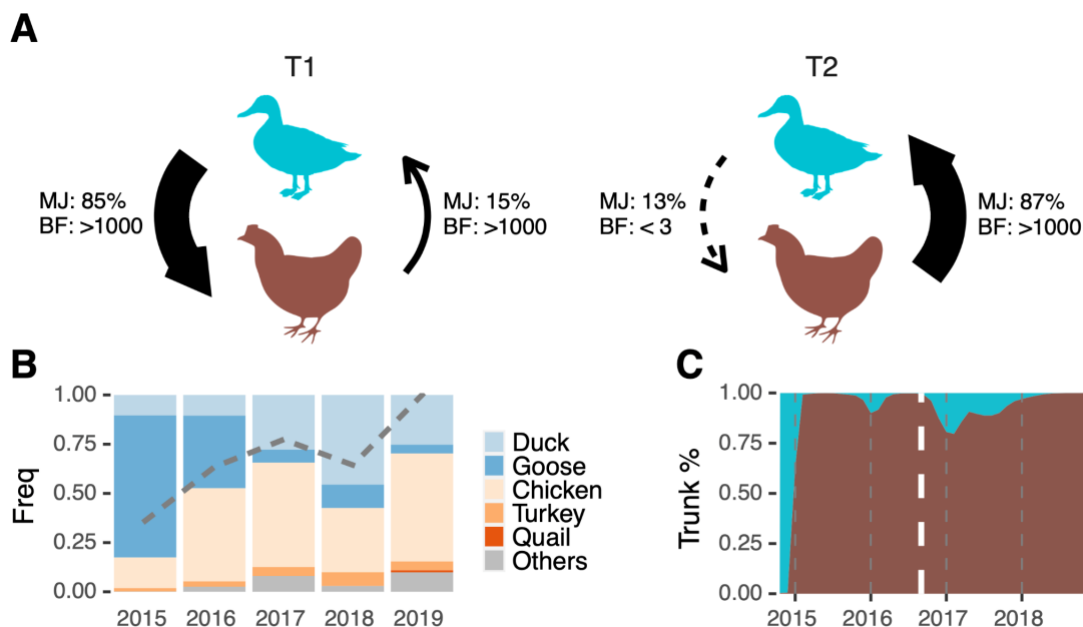

326

327

328 **Figure 7. Transmission shifted from predominantly domestic waterfowl to chicken during the**  
 329 **transition from epidemic to endemic circulation of 2.3.4.4c in Taiwan.** (A) Shift in diffusion patterns  
 330 between Anseriformes (duck and goose) and Galliformes (chicken, turkey and quail). Frequencies of  
 331 transition events (Markov jump, MJ) and statistical support (Bayes factor, BF) were inferred using the  
 332 discrete phylogenetic method. (B) The host distribution over time based on the surveillance data. The grey  
 333 dashed line indicates the proportions of Galliformes in the genetic data. (C) Inferred host categories, i.e.  
 334 Anseriformes or Galliformes species, of the trunk of clade 2.3.4.4c. The white dashed line divides T1 and  
 335 T2, with areas coloured using the same scheme as panel (A).

336

## 337 **Discussion**

338 The circulation of clade 2.3.4.4c in Taiwan presents an opportunity to study how the GsGd lineage  
339 established endemic transmission following its emergence. By comprehensively characterizing the  
340 dynamics of clade 2.3.4.4c in Taiwan, this study focuses on viral dispersal and mechanisms driving  
341 endemic transmission after the initial epidemic wave. While the introduction and the genetic origins of  
342 the virus have been reported previously<sup>20,23</sup>, the dispersal dynamics and mechanisms driving persistence  
343 were previously unknown. Our time-heterogeneous phylogeographic analyses show that nearly all viral  
344 diffusion after mid-2016 originated from a single county, in contrast to the interconnected and multi-origin  
345 diffusion between counties/cities during emergence in 2015 (Figure 3 and 4). These endemic hotspots in  
346 Taiwan, where the disease was persistent, continued to seed outbreaks in other agricultural areas, while  
347 new outbreaks were mostly under control. Therefore, our geographical reconstruction provides insights  
348 into strategic control measures to eliminate GsGd viruses in Taiwan, emphasising the need to focus on the  
349 endemic hotspots. Note that the clade 2.3.4.4c virus was still being identified in 2023<sup>24</sup>, although viral  
350 genetic data isolated after 2019 was unavailable.

351

352 Previous studies using phylogenetic GLMs have identified the poultry trade<sup>30</sup>, geographic  
353 distance<sup>31</sup> and the wild bird migration network<sup>13</sup> as predictors of GsGd viral dispersal. These studies have  
354 investigated transmission patterns globally as well as single epidemic waves, but have not examined the  
355 risk of establishment of endemic transmission. Our GLMs did not identify any significant agricultural  
356 predictors for GsGd viruses in Taiwan. Instead, our analyses highlighted location-specific factors that  
357 were not explained by the tested predictors. These results indirectly support nationwide spread from a  
358 specific endemic county with other risk factors playing only a minor role. It is possible that  
359 overparameterization due to sample size could not be excluded, although different models were

360 extensively explored (Supplementary Figures 7-8). Of all the predictors tested in the GLMs, the number  
361 of poultry farms had the highest inclusion probability (Figure 5 and Supplementary Figures 7-8), a finding  
362 corroborated by a spatial case-control study focusing on clustering of H5 viruses in Taiwan from 2015-  
363 2017<sup>27</sup>.

364

365 Lineage-specific host preferences can be targeted to prevent viral spread<sup>32</sup>. Control measures for  
366 HPAI have targeted domestic waterfowl due to their biological similarity to wild waterfowl, which are  
367 capable of long-distance dissemination<sup>8,33</sup>. In addition, infected waterfowl exhibit mild clinical  
368 manifestations compared with Galliformes species like chickens, increasing the risk of silent transmission  
369 and co-infection with multiple strains<sup>2</sup>. Our diffusion analyses indicate that GsGd transmission in Taiwan  
370 shifted from bidirectionality, with mixing between domestic waterfowl (Anseriformes species) and  
371 terrestrial species (Galliformes species), to a predominantly chicken-origin circulation (Figure 7). The  
372 greater transitions from waterfowl to terrestrial species during the first epidemic wave, aligned with  
373 devastating outbreaks in geese<sup>21,28</sup>, that did not lead to sustained descendant lineages (Figure 7C). Based  
374 on the selection analyses of the surface proteins, it is unlikely that the change in dispersal patterns between  
375 these epidemiological phases reflects virus adaptation from waterfowl to terrestrial birds (Supplementary  
376 Table 1). Instead, the results suggest that unknown factors in the chicken farming networks supported  
377 endemic circulation of GsGd in Taiwan, while viral lineages circulating in goose and duck populations  
378 were mostly eliminated. During the transition to endemicity, more than half of the Anseriformes samples  
379 were either isolated or inferred to be from Yunlin county (Supplementary Figure 3), indicating that the  
380 diffusion pattern in host ecology was not confounded by the spatial pattern described earlier.

381

382           Although these data have provided invaluable information on H5 HPAI circulation in Taiwan, it  
383 is unlikely that the surveillance data from the Taiwanese agricultural authorities identified all of the GsGd  
384 or clade 2.3.4.4c outbreaks. This limitation is implied by the results of the discrete diffusion analysis that  
385 relied solely on genetic sequences without outbreak records (Supplementary Figure 4D). The analysis  
386 exclusively identified statistically supported transmission routes originating from locations in southern  
387 Taiwan, particularly city KH, during the first epidemic phase. It was also noted that some viral samples  
388 do not precisely correspond to inferred locations (Figure 2B and Methods). Our reconstruction schemes  
389 demonstrate that state assignment strategies have little effect on all tested characteristics during the  
390 endemic phase, T2 (Supplementary Figure 4-6). There may also be an issue with the lack of explicit viral  
391 classification for each entry in the surveillance data, leading to inaccurate priors for the locations of the  
392 2.3.4.4c virus. However, there is no evidence of continued circulation of other GsGd lineages, including  
393 clade 2.3.4.4b, in Taiwan during 2015-2019, according to available sequences (see Methods) and outbreak  
394 reporting<sup>24</sup>.

395

396           Our findings indicate that in Taiwan, HPAI control should prioritise the source region, specifically  
397 by strengthening measures to interrupt transmission and improve biosecurity in poultry farms in Yunlin  
398 county. Meanwhile, epidemics in other regions could be readily suppressed. On a global scale, attention  
399 should be paid to countries newly affected by GsGd viruses after 2020<sup>12,16</sup>, as well as countries where  
400 viruses were previously seeded (Figure 1). Effective interventions can be implemented through continued  
401 local and global surveillance efforts to discern dispersal patterns supported by genomic data.

402

## 403 **Materials and Methods**

404 Sequence data preparation

405 H5 hemagglutinin (HA) sequences of avian influenza A viruses were downloaded from NCBI (Influenza  
406 Virus Resource, <https://www.ncbi.nlm.nih.gov/genomes/FLU/>)<sup>34</sup> and GISAID (EpiFlu,  
407 <https://www.gisaid.org>)<sup>35</sup> on 17 October, 2022. N2 neuraminidase (NA) sequences of part of the  
408 associated H5 viruses in Taiwan were also downloaded from the same databases. Short sequences (<1500  
409 for HA and <1200 for NA) or sequences containing notable (n=100) ambiguous nucleotides were removed  
410 from the download. Filtered genetic data were then aligned using Nextalign v2.3.0<sup>36</sup> or MAFFT v7.490<sup>37</sup>  
411 and trimmed to coding regions. Multiple basic amino acids at the H5 cleavage site were also removed.  
412 Sequences of Taiwan GsGd clade 2.3.4.4c viruses analysed in this study have all been described  
413 previously<sup>20,21,23,28,38,39</sup>.

414

#### 415 Quantifying the persistence of GsGd lineages globally

416 The above GsGd H5 sequences were first subjected to location-focused downsampling. That is, for each  
417 country where genetic data were isolated, five sequences were randomly sampled on different dates within  
418 a monthly interval. When countries had samples with incomplete temporal information, up to 50  
419 sequences were allowed to be randomly included per year. The downsampled data set was then used to  
420 reconstruct a time-scaled tree using Treetime v0.11.1<sup>40</sup> and a maximum likelihood (ML) tree inferred by  
421 IQ-TREE v2.2.0<sup>41</sup>, justified by a strong temporal signal ( $R^2=0.95$ ). The *migration* function in Treetime  
422 was performed to infer the country as ancestral states for each node. Post-introduction sublineages were  
423 defined by first identifying internal branches representing state transition and all the descending taxa of  
424 those branches. For each of these sublineages, nested transition branches were removed, resulting in a  
425 lineage each comprising taxa isolated in the same country and sharing a most common ancestor linked to  
426 viral movement. Considering the variation in sequencing effort across countries, ancestral reconstruction

427 based on transition rates informed by frequencies of HPAI H5 outbreaks during 2000-2022<sup>42</sup> was also  
428 performed.

429

430 Phylogenetic analyses and data set design

431 A ML tree was inferred for the HA alignment using IQ-TREE. Major H5 viral lineages including clades  
432 2.3.4.4b and c, were classified according to the GsGd H5N1 nomenclature proposed by the World Health  
433 Organization<sup>3,11</sup>. All available H5 viruses isolated in Taiwan were identified on the tree. A total of 292  
434 HA sequences isolated in Taiwan were classified as clade 2.3.4.4c, accounting for nearly all the available  
435 GsGd isolates in the country (292/295). The main working dataset was generated by removing duplicated  
436 sequences and viruses isolated in apparently the same outbreak (n=252). To verify results in the discrete  
437 phylogeographic analyses, more evenly distributed datasets were prepared by downsampling the  
438 sequences from Yunlin county (YL). The downsampled datasets, which include no more than six samples  
439 per year in YL, contain comparable sample sizes as the other locations where disease was prevalent  
440 (sample size in county YL, 26; CH, 27; CY, 24; PT, 26). In addition, to verify patterns in host diffusion,  
441 the N2 genes corresponding to the curated H5 datasets were collected (n=183); N2 is the predominant  
442 subtype among clade 2.3.4.4c viruses in Taiwan (Supplementary Figure 3). Temporal signal in each data  
443 set was examined by TempEst v1.5.3<sup>43</sup>, taking an ML tree inferred by IQ-TREE and times of sample  
444 collection as input. All phylogenetic trees in this study were visualised with the ggtree package<sup>44</sup>.

445

446 Epidemiological and spatial information of HPAI H5 viruses in Taiwan

447 The Taiwanese government has been actively conducting virological surveillance of HPAI H5 viruses in  
448 poultry farms and abandoned bird carcasses prior to 2015<sup>28,39</sup>. Information on the collection date, host  
449 species and subtypes of each identification report can be found on a publicly available website<sup>24</sup>. The

450 sampling sites' geographical coordinates for the reported events were obtained by parsing an interactive  
451 map embedded on the same website using the RSelenium package<sup>45</sup>. Metadata for the genetic data,  
452 including subtype, time, location at the county/city level and host, were acquired along with the sequences.  
453 Information on the sampling environment types, i.e., farms or slaughterhouses, were obtained from a  
454 recent publication by the Taiwanese government<sup>21</sup>.

455

456 Continuous phylogeographic analyses

457 We adopted a recently developed method to account for uncertainty in the sampling location for  
458 evolutionary reconstructions in continuous space<sup>46,47</sup>. Specifically, for each sequence, a prior describing  
459 multiple polygons and their corresponding probabilities was defined in a Keyhole Markup Language  
460 (KML) file, and thereby incorporated into the Bayesian Markov chain Monte Carlo (MCMC) process  
461 performed by BEAST<sup>48</sup>. To construct the priors in this study, candidate locations for each genetic  
462 sequence were defined based on the sampling sites of the surveillance data. The candidate locations were  
463 gathered by matching the sequence's metadata, i.e. host, subtype, and county/city, to the reported events,  
464 along with a dynamic time-interval starting with (1) the collection date; if no hit was found with  
465 compatible information and in the time-interval, (2) the collection date  $\pm 7$  was used. After conducting  
466 two searches, the centroids of all subdivisions in the county/city (i.e. town or area) of the sample were  
467 assigned to each unmatched sequence. The probabilities of a prior were uniform for sequences that were  
468 compatible with events in the surveillance data. However, for sequences that we were unable to link to  
469 reported events, the probabilities were assigned proportionally to the incidence of H5 HPAI during 2015-  
470 2019 in subdivisions. Each site with geographical coordinates was expanded to a minimum area of latitude  
471  $\pm 0.0003$  and longitude  $\pm 0.0005$  to fit the polygon format in the original approach<sup>46</sup>. A sample collected  
472 in a slaughterhouse or rendering factory was assigned to the location of one arbitrarily selected



473 slaughterhouse for each county/city based on the registry data ([www.baphiq.gov.tw](http://www.baphiq.gov.tw), accessed 22 March  
474 2023).

475

476 Continuous phylogeographic analyses were performed with the Cauchy Relaxed Random Walk  
477 (RRW) model implemented in BEAST v1.10.4<sup>25,49</sup>. A general time reversible (GTR) substitution model,  
478 a gamma-distributed rate and an uncorrelated lognormal relaxed molecular clock<sup>50</sup> were employed in the  
479 Bayesian analyses, along with the Skygrid demographic model<sup>51</sup>. The MCMC was run for 550 million  
480 steps, with samples taken every 10,000 steps after removing 50 million steps as burn-in. Parallel runs were  
481 conducted to confirm the observed pattern. A starting tree was added to each run to facilitate the sampling  
482 of tree topologies. The results of continuous phylogeographic analyses were visualised with the  
483 SERAPHIM package<sup>52</sup>.

484

485 Discrete phylogeographic analyses with an epoch model

486 To evaluate differences in spatial dispersal patterns throughout different epidemiological phases, from the  
487 introduction to the development of endemicity, we employed a time-heterogeneous transition rate model  
488 with the discrete phylogeographic method<sup>53</sup>. The method enables the Bayesian discrete state inference to  
489 accommodate multiple rate matrices, each of which specified by one time interval (epoch). Therefore,  
490 transition frequencies and statistically supported directions in different intervals can be simultaneously  
491 estimated on the same phylogeny. We defined two time intervals, T1 and T2, divided by the date 1  
492 September, 2016, based on sample sizes of the sequence data and the epidemiological trajectory (Figure  
493 2). Transition parameters were estimated using an asymmetric substitution model with Bayesian stochastic  
494 search variable selection (BSSVS)<sup>54</sup>.

495

496 To better approximate the locations of the original farms, uncertain discrete state assignment was  
497 applied to the samples collected in slaughterhouses or rendering factories<sup>55</sup>. Similar to the strategy we  
498 used for the analyses in continuous space, we informed the priors of the uncertain discrete locations with  
499 surveillance data. We gathered candidate locations at the county/city level by matching the sequence's  
500 metadata to the reports within a 15-day interval (collection date +-7). If no matched events were found,  
501 we extended the interval to 90 days. The probabilities linked to the locations were proportional to the  
502 corresponding events in different counties and cities. The dispersal between hosts was also assessed by  
503 classifying sequences into the order of Anseriformes or Galliformes.

504

505 Additionally, we used a generalised linear model (GLM) incorporated into the discrete  
506 phylogenetic framework to investigate the potential predictors' contribution to the transition between  
507 locations<sup>56</sup>. The predictors included (1) road distance, (2) shared border, (3) number of poultry farms, (4)  
508 poultry population, (5) poultry heterogeneity, (6) area of cropland and (7) number of viral sequences.  
509 Poultry farm, poultry heterogeneity and cropland area were added to the model as covariates for both  
510 origin and destination. Poultry farm, poultry population, poultry heterogeneity and sample size were  
511 treated as time-heterogeneous by averaging the annual values in the two intervals (2015-2016 and 2016-  
512 2019)(Supplementary Figure 2), while all predictors were log-transformed and standardised before  
513 inclusion in the matrices. The GLM model was adapted using previously described methods to assume  
514 temporally heterogeneous effect sizes and inclusion probabilities<sup>13,57</sup>. To account for unexplained  
515 variability, models that included time-homogeneous random effect variables specifying the effects as both  
516 origin and destination of each location were also implemented<sup>58,59</sup>. To validate the results, we performed  
517 reduced GLM models with no more than two predictors and a time-homogeneous GLM model including  
518 all the aforementioned predictors.

519

520 BEAST v1.10.5 (pre-released v0.1.2) was used to implement time-heterogeneous rate models with  
521 MCMC chains of 110 million steps<sup>48</sup>. Performance of the GLM estimations were improved by applying a  
522 set of empirical trees. All BEAST runs were facilitated by the BEAGLE library<sup>60</sup>. Convergence was  
523 examined using Tracer v1.7.2<sup>61</sup>, ensuring that effective sampling sizes (ESS) were greater than 200 for all  
524 continuous parameters.

525

526 Posterior analyses. The number of transitions between the two states was quantified by Markov  
527 jumps<sup>62</sup>. Bayes factors (BF) were calculated based on the indicators of transition rates resulting from  
528 BSSVS to determine statistically supported diffusion routes. Routes with  $BF > 20$  were considered  
529 supported and were classified into two categories: 20-150 and  $>150$ , which are typically referred to as  
530 'strong' and 'very strong'<sup>63</sup>. The duration of viral persistence was evaluated using maximised time intervals  
531 that were unified by branch lengths, where both nodes were inferred to be in the same location. Trunk  
532 probabilities over time were summarised by PACT v0.9.4 (<https://github.com/trvrb/PACT>). Trunks were  
533 defined as ancestral branches shared by sequences isolated in 2019. Persistence and trunk probability were  
534 calculated using 1000 MCMC trees sampled from the posterior phylogeny distributions.

535

536 Probing the spatial distribution of re-emergent outbreaks

537 Buffers representing disease hotspots on the map were created by parsing geographical coordinates  
538 inferred at the nodes of the posterior trees in the continuous phylogeographic calibrations, including tips  
539 and internal nodes. A buffer was defined as the area within 1 km of the inferred point location. The buffers  
540 created by the phylogenetic inference were merged with or without the buffers created by the sampling  
541 sites of contemporary outbreak events reported in the surveillance data for each tree. Only nodes estimated

542 no earlier than 1 September, 2016 (i.e. during the endemic phase, T2) and the outbreaks during the same  
543 period were taken as central points to create buffers. The nodes and the outbreaks were stratified by  
544 county/city before being transformed from points to polygons. Coverage ("captured") was determined by  
545 the sites of new outbreaks covered by the merged buffer areas. New outbreaks were defined as outbreaks  
546 occurring after the latest genetic sample, during 2019-2022. The captured outbreaks were summarised as  
547 proportions with 1000 posterior trees, whose node numbers were also used to generate randomly  
548 distributed null models. To evaluate the coverage performance, sensitivity analyses were conducted on  
549 buffer size considering multiple radius distances, including 0.5, 1 and 2 km. The spatial data manipulation  
550 was performed using the *sf* package<sup>64</sup>. The map data (shp files) were obtained from the government open  
551 data platform (data.gov.tw).

552

553 Data sources of potential predictors

554 Road distances between counties and cities in Taiwan were measured with Google Maps. Data on  
555 agricultural statistics, including the number of poultry farms, poultry population and cropland area during  
556 2015-2019 were obtained from the Agricultural Statistics Database of the Ministry of Agriculture  
557 (<https://agrstat.moa.gov.tw/sdweb>). Poultry heterogeneity was calculated as Simpson's Index of  
558 Diversity<sup>65</sup>.

559

560 Selection analyses

561 SLAC<sup>66</sup> and MEME<sup>67</sup> in the Datamonkey platform<sup>68</sup> were used to detect pervasive and episodic positive  
562 selection sites, respectively, with a default statistical significance level of  $p < 0.1$ . HyPhy v.2.3.14<sup>69</sup> was  
563 used to calculate non-synonymous/synonymous rate ratio, dN/dS ( $\omega$ ) estimates. The results of the surface

564 proteins in the clade 2.3.4.4c viruses were compared with those in an enzootic, non-GsGd H5N2 lineage  
565 previously described in Taiwan<sup>20,29</sup>.

566

567 Data and code availability

568 The custom codes used in analyses, and the XML files required for BEAST can be found at  
569 <https://github.com/yaotli/endemic>. The accession numbers of the Taiwan sequences analysed in our study  
570 are listed in Supplementary Table 2.

571

## 572 **Acknowledgements**

573 The work was supported by the UK Research and Innovation Global effort on COVID-19  
574 (MR/V035444/1), Wellcome (207569/Z/17/Z, 224520/Z/21/Z), , the UK Medical Research Council New  
575 Investigator Research Grant (MR/X002047/1) and a University of Glasgow Lord Kelvin/Adam Smith  
576 Fellowship to KB. We are grateful for the continued surveillance efforts of the Animal and Plant Health  
577 Inspection Agency, MOA, Taiwan. We acknowledge the authors, originating laboratories, and submitting  
578 entities responsible for providing the sequences obtained from GISAID.

579

580

581

582

583

584

585

586 **References**

- 587 1. Karesh, W. B. *et al.* Ecology of zoonoses: natural and unnatural histories. *The Lancet* **380**, 1936–  
588 1945 (2012).
- 589 2. Guan, Y. & Smith, G. J. D. The emergence and diversification of panzootic H5N1 influenza viruses.  
590 *Virus Research* **178**, 35–43 (2013).
- 591 3. Smith, G. J. D., Donis, R. O., & World Health Organization/World Organisation for Animal  
592 Health/Food and Agriculture Organization (WHO/OIE/FAO) H5 Evolution Working Group.  
593 Nomenclature updates resulting from the evolution of avian influenza A(H5) virus clades 2.1.3.2a,  
594 2.2.1, and 2.3.4 during 2013–2014. *Influenza and Other Respiratory Viruses* **9**, 271–276 (2015).
- 595 4. Li, Y.-T., Su, Y. C. F. & Smith, G. J. D. H5Nx Viruses Emerged during the Suppression of H5N1  
596 Virus Populations in Poultry. *Microbiology Spectrum* **9**, e01309-21 (2021).
- 597 5. *Approaches to Controlling, Preventing and Eliminating H5N1 Highly Pathogenic Avian Influenza in*  
598 *Endemic Countries*. (FAO, Rome, 2011).
- 599 6. Vijaykrishna, D. *et al.* Evolutionary Dynamics and Emergence of Panzootic H5N1 Influenza  
600 Viruses. *PLOS Pathogens* **4**, e1000161 (2008).
- 601 7. Tian, H. *et al.* Avian influenza H5N1 viral and bird migration networks in Asia. *Proceedings of the*  
602 *National Academy of Sciences* **112**, 172–177 (2015).
- 603 8. Trovão, N. S., Suchard, M. A., Baele, G., Gilbert, M. & Lemey, P. Bayesian Inference Reveals  
604 Host-Specific Contributions to the Epidemic Expansion of Influenza A H5N1. *Molecular Biology*  
605 *and Evolution* **32**, 3264–3275 (2015).
- 606 9. Medina, R. A. & García-Sastre, A. Influenza A viruses: new research developments. *Nat Rev*  
607 *Microbiol* **9**, 590–603 (2011).
- 608 10. Saito, T. *et al.* Intracontinental and intercontinental dissemination of Asian H5 highly pathogenic

- 609 avian influenza virus (clade 2.3.4.4) in the winter of 2014–2015. *Reviews in Medical Virology* **25**,  
610 388–405 (2015).
- 611 11. WHO. Antigenic and genetic characteristics of zoonotic influenza A viruses and development of  
612 candidate vaccine viruses for pandemic preparedness (February, 2020). (2020).
- 613 12. Cruz, C. D. *et al.* Highly Pathogenic Avian Influenza A(H5N1) from Wild Birds, Poultry, and  
614 Mammals, Peru. *Emerg Infect Dis* **29**, 2572–2576 (2023).
- 615 13. Zhang, G. *et al.* Bidirectional Movement of Emerging H5N8 Avian Influenza Viruses Between  
616 Europe and Asia via Migratory Birds Since Early 2020. *Molecular Biology and Evolution* **40**,  
617 msad019 (2023).
- 618 14. Agüero, M. *et al.* Highly pathogenic avian influenza A(H5N1) virus infection in farmed minks,  
619 Spain, October 2022. *Eurosurveillance* **28**, 2300001 (2023).
- 620 15. Nguyen, T.-Q. *et al.* Emergence and interstate spread of highly pathogenic avian influenza A(H5N1)  
621 in dairy cattle. 2024.05.01.591751 Preprint at <https://doi.org/10.1101/2024.05.01.591751> (2024).
- 622 16. Pohlmann, A. *et al.* Has Epizootic Become Enzootic? Evidence for a Fundamental Change in the  
623 Infection Dynamics of Highly Pathogenic Avian Influenza in Europe, 2021. *mBio* **13**, e00609-22  
624 (2022).
- 625 17. Lee, Y.-J. *et al.* Novel Reassortant Influenza A(H5N8) Viruses, South Korea, 2014. *Emerg Infect*  
626 *Dis* **20**, 1087–1089 (2014).
- 627 18. Ip, H. S. *et al.* Novel Eurasian highly pathogenic avian influenza A H5 viruses in wild birds,  
628 Washington, USA, 2014. *Emerg Infect Dis* **21**, 886–890 (2015).
- 629 19. Kanehira, K. *et al.* Characterization of an H5N8 influenza A virus isolated from chickens during an  
630 outbreak of severe avian influenza in Japan in April 2014. *Arch Virol* **160**, 1629–1643 (2015).
- 631 20. Li, Y.-T., Chen, C.-C., Chang, A.-M., Chao, D.-Y. & Smith, G. J. D. Co-circulation of both low and

- 632 highly pathogenic avian influenza H5 viruses in current poultry epidemics in Taiwan. *Virus*  
633 *Evolution* **6**, veaa037 (2020).
- 634 21. Huang, C.-W. *et al.* Evolutionary history of H5 highly pathogenic avian influenza viruses (clade  
635 2.3.4.4c) circulating in Taiwan during 2015–2018. *Infection, Genetics and Evolution* **92**, 104885  
636 (2021).
- 637 22. Chang, C.-F. *et al.* Lessons from the Largest Epidemic of Avian Influenza Viruses in Taiwan, 2015.  
638 *Avian Diseases* **60**, 156–171 (2016).
- 639 23. Huang, P.-Y. *et al.* Genetic characterization of highly pathogenic H5 influenza viruses from poultry  
640 in Taiwan, 2015. *Infection, Genetics and Evolution* **38**, 96–100 (2016).
- 641 24. BAPHIQ. Epidemic Situation of Avian Influenza. <https://twai.baphiq.gov.tw/AI/> accessed 22 Feb  
642 2023 (2023).
- 643 25. Lemey, P., Rambaut, A., Welch, J. J. & Suchard, M. A. Phylogeography Takes a Relaxed Random  
644 Walk in Continuous Space and Time. *Molecular Biology and Evolution* **27**, 1877–1885 (2010).
- 645 26. Dellicour, S. *et al.* Relax, Keep Walking — A Practical Guide to Continuous Phylogeographic  
646 Inference with BEAST. *Molecular Biology and Evolution* **38**, 3486–3493 (2021).
- 647 27. Liang, W.-S. *et al.* Ecological factors associated with persistent circulation of multiple highly  
648 pathogenic avian influenza viruses among poultry farms in Taiwan during 2015–17. *PLOS ONE* **15**,  
649 e0236581 (2020).
- 650 28. Lee, M.-S. *et al.* Highly pathogenic avian influenza viruses H5N2, H5N3, and H5N8 in Taiwan in  
651 2015. *Veterinary Microbiology* **187**, 50–57 (2016).
- 652 29. Lee, C.-C. D. *et al.* Emergence and Evolution of Avian H5N2 Influenza Viruses in Chickens in  
653 Taiwan. *Journal of Virology* **88**, 5677–5686 (2014).
- 654 30. Yang, Q. *et al.* Assessing the role of live poultry trade in community-structured transmission of



- 655 avian influenza in China. *Proceedings of the National Academy of Sciences* **117**, 5949–5954 (2020).
- 656 31. Hicks, J. T. *et al.* Agricultural and geographic factors shaped the North American 2015 highly  
657 pathogenic avian influenza H5N2 outbreak. *PLOS Pathogens* **16**, e1007857 (2020).
- 658 32. Haydon, D. T., Cleaveland, S., Taylor, L. H. & Laurenson, M. K. Identifying reservoirs of infection:  
659 a conceptual and practical challenge. *Emerging infectious diseases* **8**, 1468–1473 (2002).
- 660 33. Bahl, J. *et al.* Ecosystem Interactions Underlie the Spread of Avian Influenza A Viruses with  
661 Pandemic Potential. *PLOS Pathogens* **12**, e1005620 (2016).
- 662 34. Bao, Y. *et al.* The influenza virus resource at the National Center for Biotechnology Information. *J*  
663 *Virology* **82**, 596–601 (2008).
- 664 35. Shu, Y. & McCauley, J. GISAID: Global initiative on sharing all influenza data – from vision to  
665 reality. *Eurosurveillance* **22**, 30494 (2017).
- 666 36. Aksamentov, I., Roemer, C., Hodcroft, E. B. & Neher, R. A. Nextclade: clade assignment, mutation  
667 calling and quality control for viral genomes. *Journal of Open Source Software* **6**, 3773 (2021).
- 668 37. Kuraku, S., Zmasek, C. M., Nishimura, O. & Katoh, K. aLeaves facilitates on-demand exploration  
669 of metazoan gene family trees on MAFFT sequence alignment server with enhanced interactivity.  
670 *Nucleic Acids Research* **41**, W22–W28 (2013).
- 671 38. The Global Consortium for H5N8 and Related Influenza Viruses. Role for migratory wild birds in  
672 the global spread of avian influenza H5N8. *Science* **354**, 213–217 (2016).
- 673 39. Chen, L.-H. *et al.* Molecular Epidemiology in H5Nx Subtypes of Avian Influenza Virus in Taiwan  
674 in 2015. *Experimental report of national institute for animal health* **51**, 53–68 (2017).
- 675 40. Sagulenko, P., Puller, V. & Neher, R. A. TreeTime: Maximum-likelihood phylodynamic analysis.  
676 *Virus Evolution* **4**, vex042 (2018).
- 677 41. Minh, B. Q. *et al.* IQ-TREE 2: New Models and Efficient Methods for Phylogenetic Inference in the

- 678 Genomic Era. *Molecular Biology and Evolution* **37**, 1530–1534 (2020).
- 679 42. FAO. Empres-i. <https://empres-i.apps.fao.org/> accessed 19 Aug 2023 (2023).
- 680 43. Rambaut, A., Lam, T. T., Max Carvalho, L. & Pybus, O. G. Exploring the temporal structure of  
681 heterochronous sequences using TempEst (formerly Path-O-Gen). *Virus Evol* **2**, vew007 (2016).
- 682 44. Yu, G., Smith, D. K., Zhu, H., Guan, Y. & Lam, T. T.-Y. ggtree: an r package for visualization and  
683 annotation of phylogenetic trees with their covariates and other associated data. *Methods in Ecology*  
684 *and Evolution* **8**, 28–36 (2017).
- 685 45. Harrison, J., Kim, J. Y. & Völkle, J. RSelenium: R Bindings for ‘Selenium WebDriver’. (2023).
- 686 46. Dellicour, S. *et al.* Incorporating heterogeneous sampling probabilities in continuous  
687 phylogeographic inference — Application to H5N1 spread in the Mekong region. *Bioinformatics* **36**,  
688 2098–2104 (2020).
- 689 47. Dellicour, S., Lemey, P., Suchard, M. A., Gilbert, M. & Baele, G. Accommodating sampling  
690 location uncertainty in continuous phylogeography. *Virus Evolution* **8**, veac041 (2022).
- 691 48. Suchard, M. A. *et al.* Bayesian phylogenetic and phylodynamic data integration using BEAST 1.10.  
692 *Virus Evolution* **4**, vey016 (2018).
- 693 49. Pybus, O. G. *et al.* Unifying the spatial epidemiology and molecular evolution of emerging  
694 epidemics. *Proceedings of the National Academy of Sciences* **109**, 15066–15071 (2012).
- 695 50. Drummond, A. J., Ho, S. Y. W., Phillips, M. J. & Rambaut, A. Relaxed Phylogenetics and Dating  
696 with Confidence. *PLOS Biology* **4**, e88 (2006).
- 697 51. Gill, M. S. *et al.* Improving Bayesian population dynamics inference: a coalescent-based model for  
698 multiple loci. *Mol Biol Evol* **30**, 713–724 (2013).
- 699 52. Dellicour, S., Rose, R., Faria, N. R., Lemey, P. & Pybus, O. G. SERAPHIM: studying  
700 environmental rasters and phylogenetically informed movements. *Bioinformatics* **32**, 3204–3206

- 701 (2016).
- 702 53. Bielejec, F., Lemey, P., Baele, G., Rambaut, A. & Suchard, M. A. Inferring Heterogeneous  
703 Evolutionary Processes Through Time: from Sequence Substitution to Phylogeography. *Systematic*  
704 *Biology* **63**, 493–504 (2014).
- 705 54. Lemey, P., Rambaut, A., Drummond, A. J. & Suchard, M. A. Bayesian Phylogeography Finds Its  
706 Roots. *PLOS Computational Biology* **5**, e1000520 (2009).
- 707 55. Scotch, M. *et al.* Incorporating sampling uncertainty in the geospatial assignment of taxa for virus  
708 phylogeography. *Virus Evolution* **5**, vey043 (2019).
- 709 56. Lemey, P. *et al.* Unifying Viral Genetics and Human Transportation Data to Predict the Global  
710 Transmission Dynamics of Human Influenza H3N2. *PLOS Pathogens* **10**, e1003932 (2014).
- 711 57. Lemey, P. *et al.* Untangling introductions and persistence in COVID-19 resurgence in Europe.  
712 *Nature* **595**, 713–717 (2021).
- 713 58. Dudas, G. *et al.* Virus genomes reveal factors that spread and sustained the Ebola epidemic. *Nature*  
714 **544**, 309–315 (2017).
- 715 59. Hong, S. L. *et al.* In Search of Covariates of HIV-1 Subtype B Spread in the United States—A  
716 Cautionary Tale of Large-Scale Bayesian Phylogeography. *Viruses* **12**, 182 (2020).
- 717 60. Ayres, D. L. *et al.* BEAGLE 3: Improved Performance, Scaling, and Usability for a High-  
718 Performance Computing Library for Statistical Phylogenetics. *Systematic Biology* **68**, 1052–1061  
719 (2019).
- 720 61. Rambaut, A., Drummond, A. J., Xie, D., Baele, G. & Suchard, M. A. Posterior Summarization in  
721 Bayesian Phylogenetics Using Tracer 1.7. *Systematic Biology* **67**, 901–904 (2018).
- 722 62. Minin, V. N. & Suchard, M. A. Counting labeled transitions in continuous-time Markov models of  
723 evolution. *J Math Biol* **56**, 391–412 (2008).

- 724 63. Kass, R. E. & Raftery, A. E. Bayes Factors. *Journal of the American Statistical Association* **90**, 773–  
725 795 (1995).
- 726 64. Pebesma, E. Simple Features for R: Standardized Support for Spatial Vector Data. *The R Journal*  
727 **10**, 439–446 (2018).
- 728 65. Simpson, E. H. Measurement of Diversity. *Nature* **163**, 688–688 (1949).
- 729 66. Kosakovsky Pond, S. L. & Frost, S. D. W. Not So Different After All: A Comparison of Methods  
730 for Detecting Amino Acid Sites Under Selection. *Molecular Biology and Evolution* **22**, 1208–1222  
731 (2005).
- 732 67. Murrell, B. *et al.* Detecting Individual Sites Subject to Episodic Diversifying Selection. *PLOS*  
733 *Genetics* **8**, e1002764 (2012).
- 734 68. Weaver, S. *et al.* Datamonkey 2.0: A Modern Web Application for Characterizing Selective and  
735 Other Evolutionary Processes. *Molecular Biology and Evolution* **35**, 773–777 (2018).
- 736 69. Pond, S. L. K., Frost, S. D. W. & Muse, S. V. HyPhy: hypothesis testing using phylogenies.  
737 *Bioinformatics* **21**, 676–679 (2005).

738

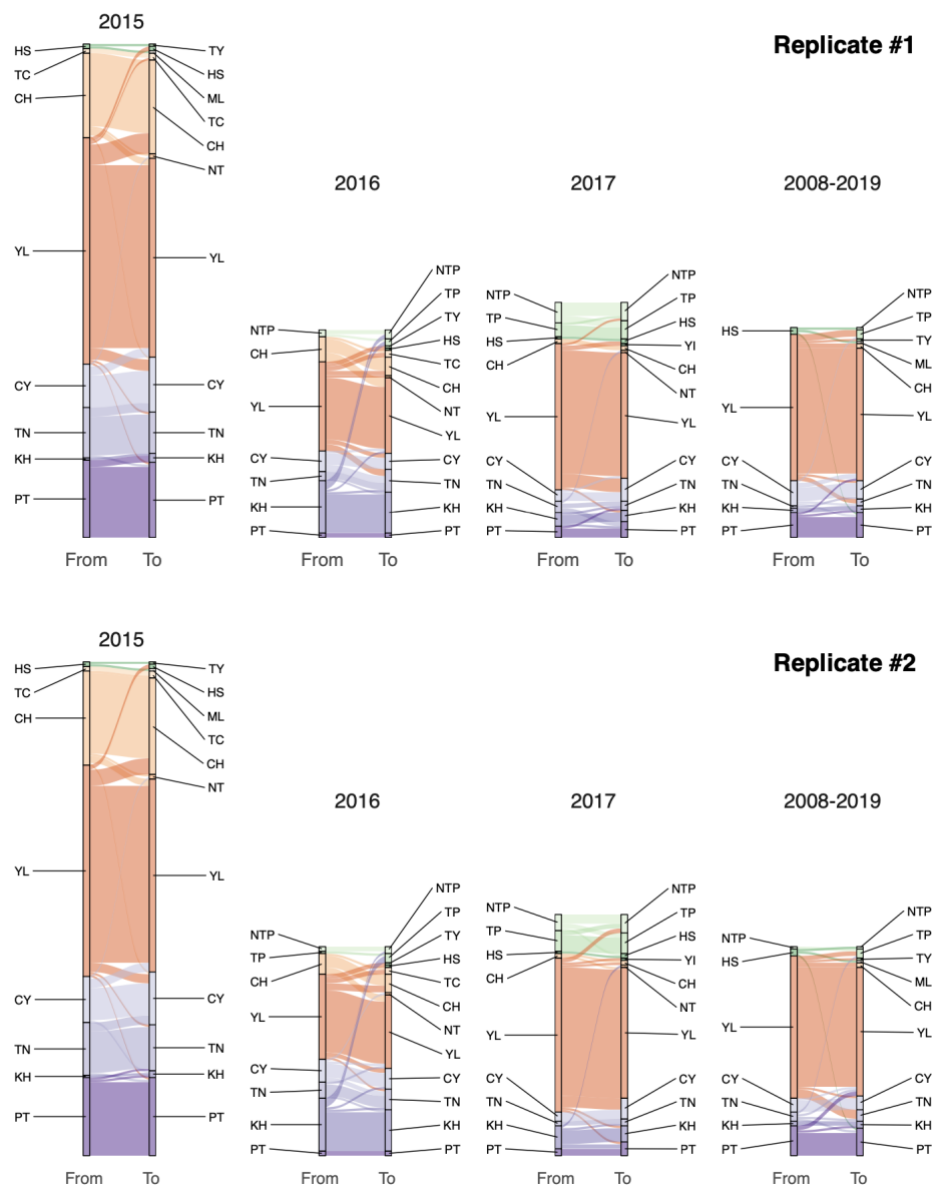

739

740 **Supplementary figure 1.** Visualisation of the dispersal pattern of the clade 2.3.4.4c virus in discrete  
741 geographical divisions. The connected lines represent branches inferred by the continuous  
742 phylogeographic approach (see Figure 3), with origin and destination locations determined as county or  
743 city-level divisions. The lines were coloured based on the origin. Replicated results from parallel runs are  
744 shown.

745

### A Poultry farm

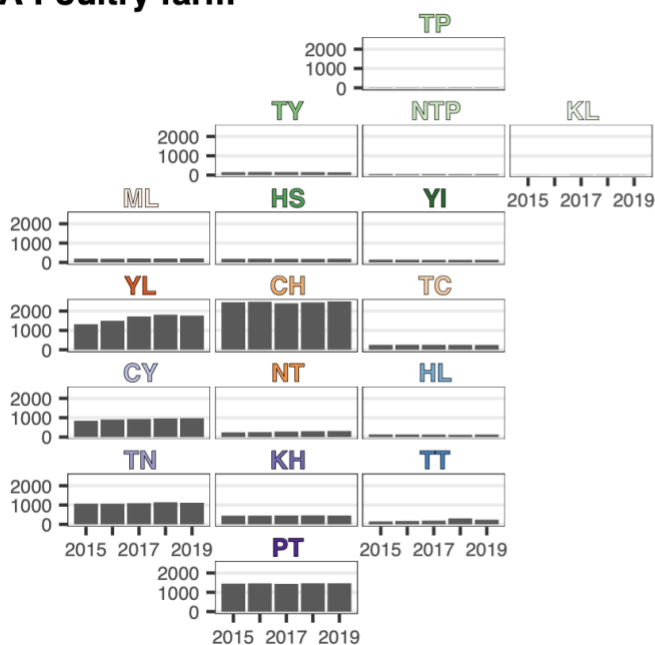

### B Poultry population (10<sup>6</sup>)

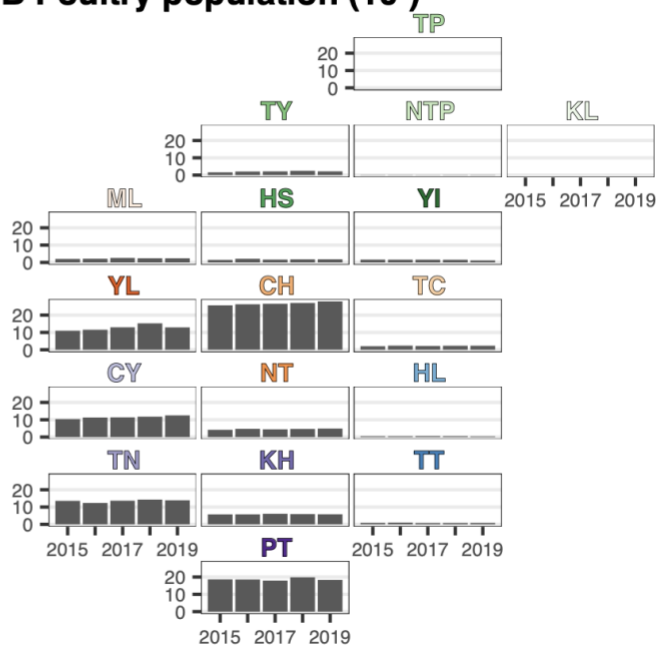

### C Poultry heterogeneity

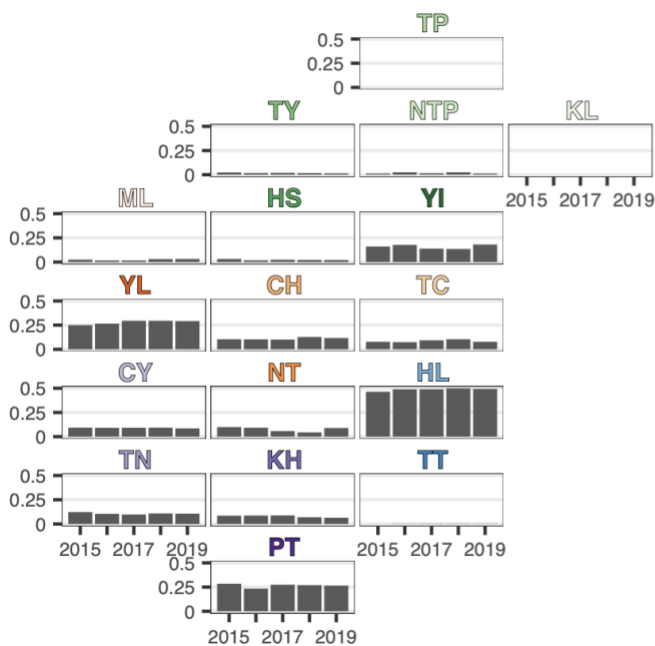

### D Cropland area (km<sup>2</sup>)

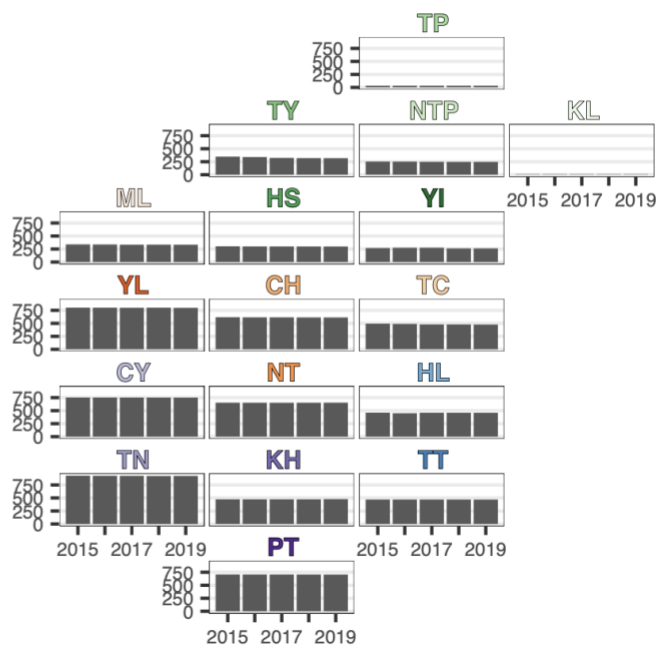

746

747

748 **Supplementary figure 2.** Agricultural characteristics of county or city-level administrative areas in  
 749 Taiwan.

750

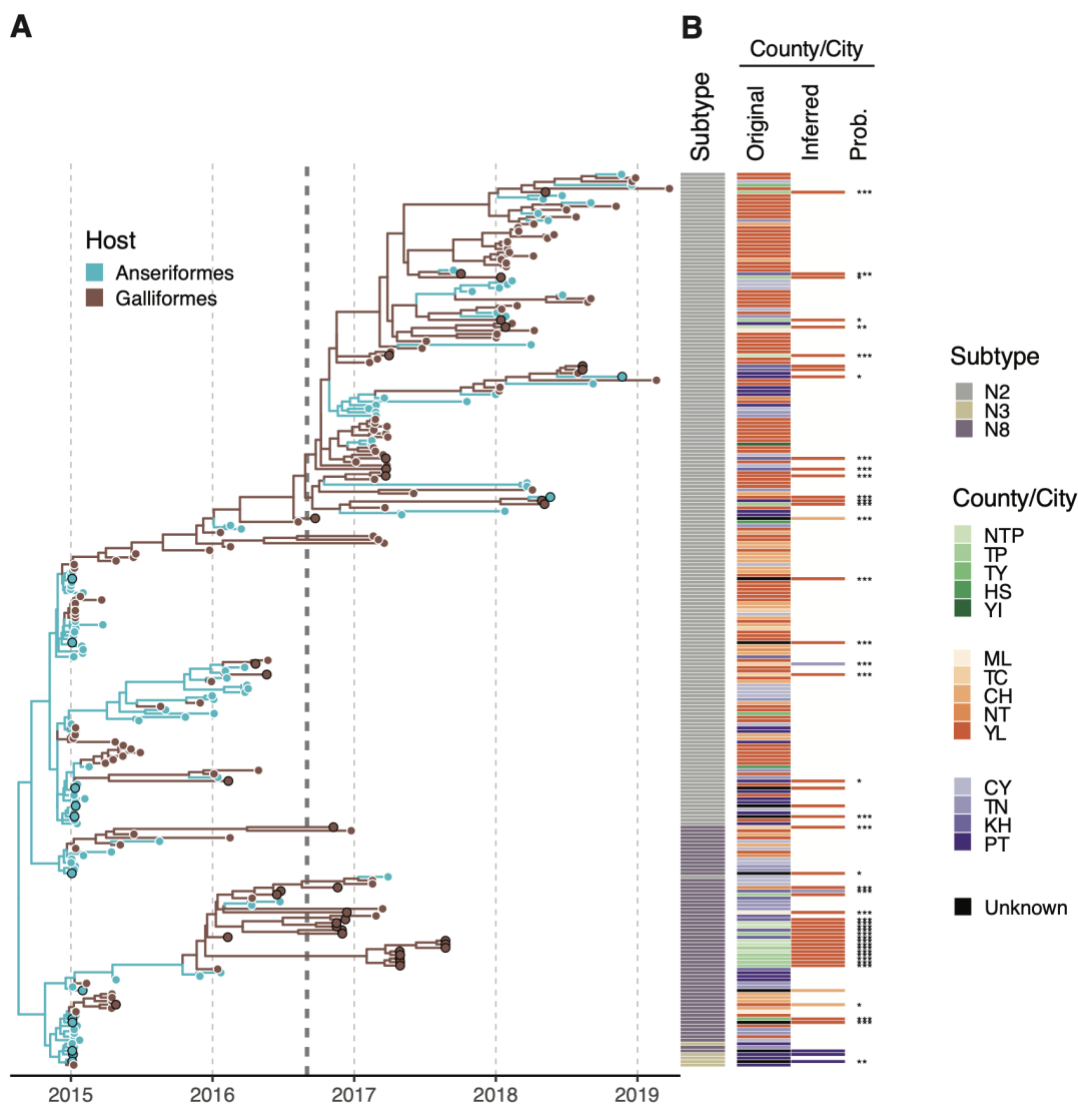

**Supplementary figure 3.** Summary of the host and geographical information associated with the genomic data used in this study. (A) The time-scaled phylogeny was reconstructed using the HA genes of the clade 2.3.4.4c virus in Taiwan. The tips on the phylogeny are colored according to the host genera, Galliformes (chicken, turkey and quail) or Anseriformes (duck and goose), logged in the sequence metadata. The branches are colored according to the states inferred on the summarized maximum clade credibility (MCC) tree. The tips with black borders indicate taxa that have uncertain state assignments in geographical analyses. The vertical dashed line denotes September 1st, 2016. (B) The adjacent heatmap shows the NA

760 subtypes and the corresponding collection locations of the tree taxa. The discrete diffusion model was  
761 used to estimate the uncertain geographical locations and posterior probabilities. Only the results of  
762 samples collected in slaughterhouses/rendering factories and samples lacking geospatial information,  
763 which were implemented with state uncertainty, are shown in the 'Inferred' column. The symbols \*, \*\*  
764 and \*\*\* denote posterior probability > 0.7, 0.8 and 0.9, respectively.

765

766

767

768

769

770

771



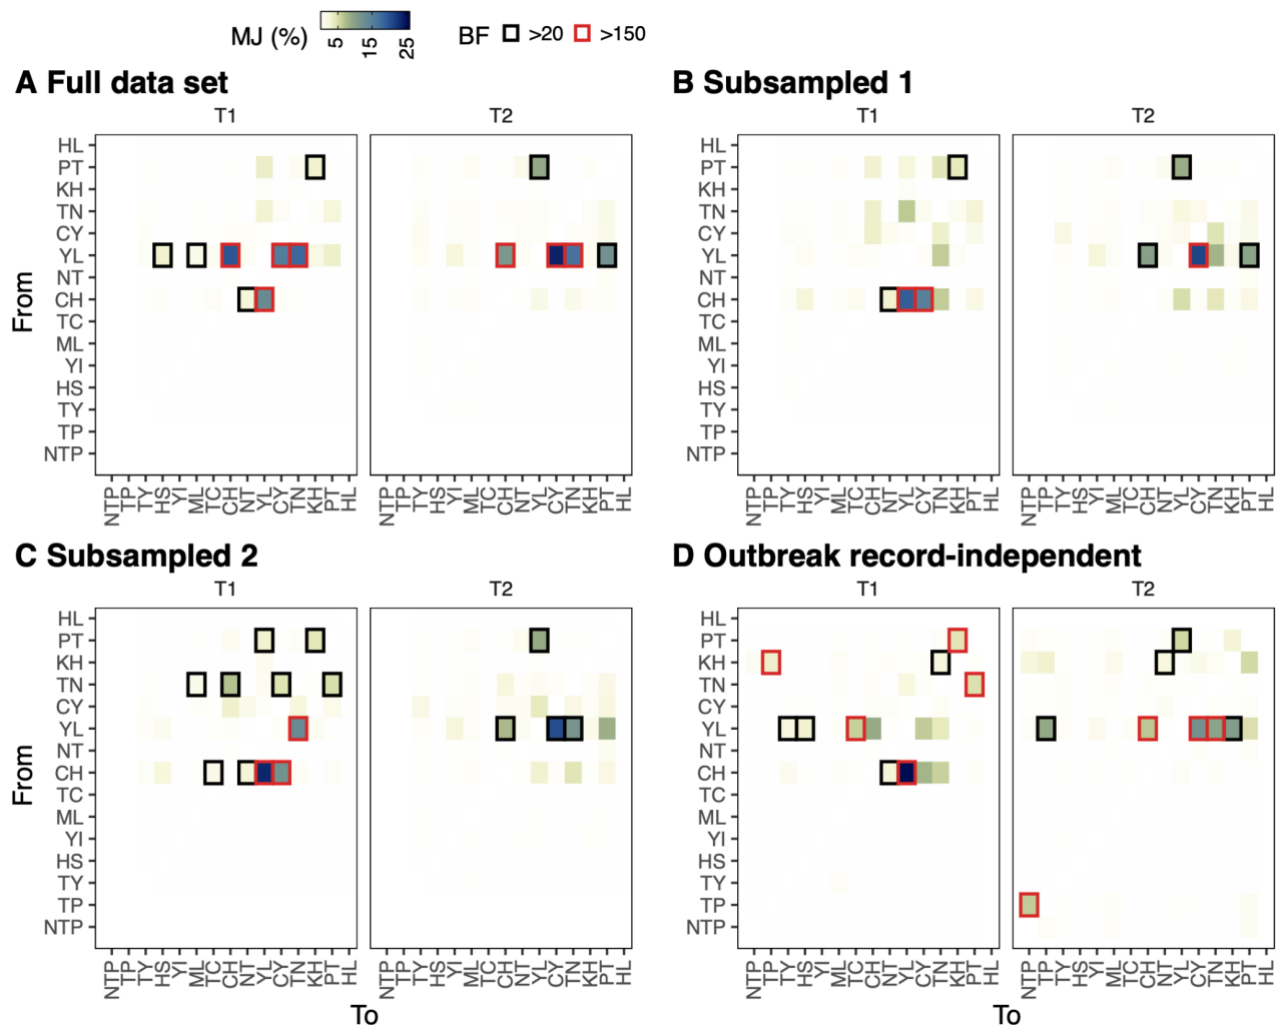

772

773 **Supplementary figure 4.** Estimated number of transition events between counties/cities in Taiwan  
 774 inferred by the discrete phylogeographic method. The color of the heatmap reflects the proportions of  
 775 between-locations Markov jumps to the total jumps in the distinct time period. The directions supported  
 776 by Bayesian factor (BF) are highlighted by black (>20) or red (>150) edges. Results of a full genomic data  
 777 set (A), along with two data sets with reduced samples from county YL are shown (B and C). Using the  
 778 same genomic data as panel (A), Bayesian inference was performed for panel (D) with geographical states  
 779 assigned independently of outbreak records. The locations were determined by the sequence metadata if  
 780 available, or using a uniform prior over all isolated counties/cities if the collection site was unknown.

781

### A Full data set

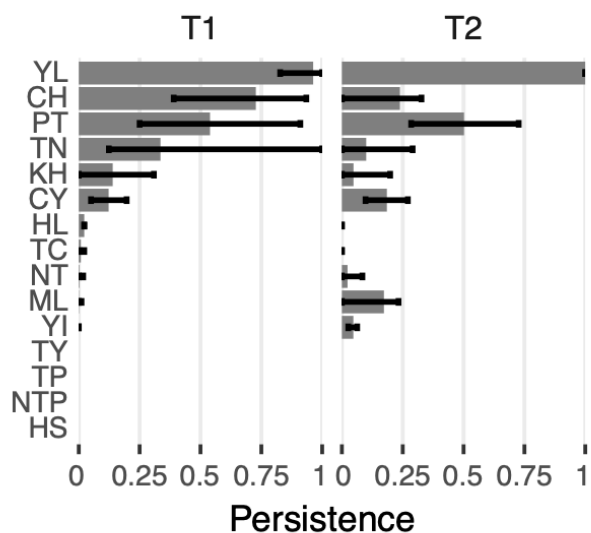

### B Subsampled 1

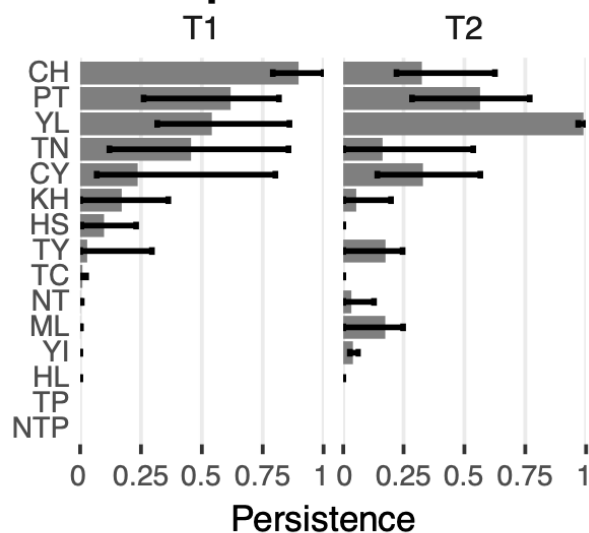

### C Subsampled 2

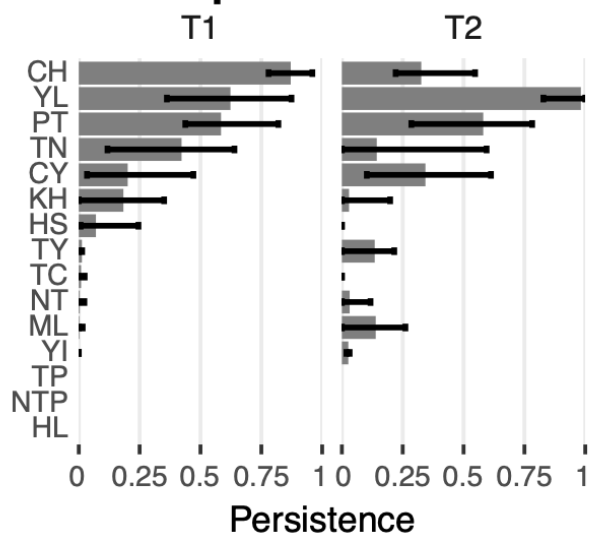

### D Outbreak record-independent

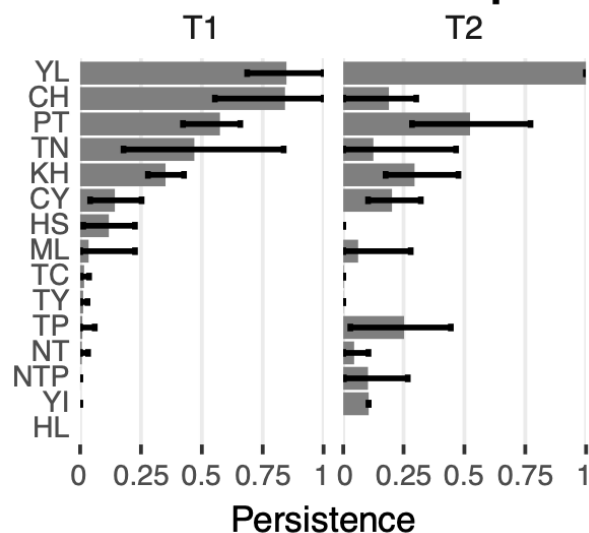

782

783 **Supplementary figure 5.** Persistence of the virus assessed by the discrete phylogeographic method. To  
 784 calculate the value for each location, the branch length was unified from branches where both nodes were  
 785 estimated to share the same state. The unified time interval was presented as a proportion divided by the  
 786 time span of T1/T2. The mean and 95% HPD of the proportions summarized by 1000 posterior trees are  
 787 indicated by the bars. The results of the four panels were obtained from the same MCMC runs as the  
 788 corresponding panels in Supplementary Figure 4.

789

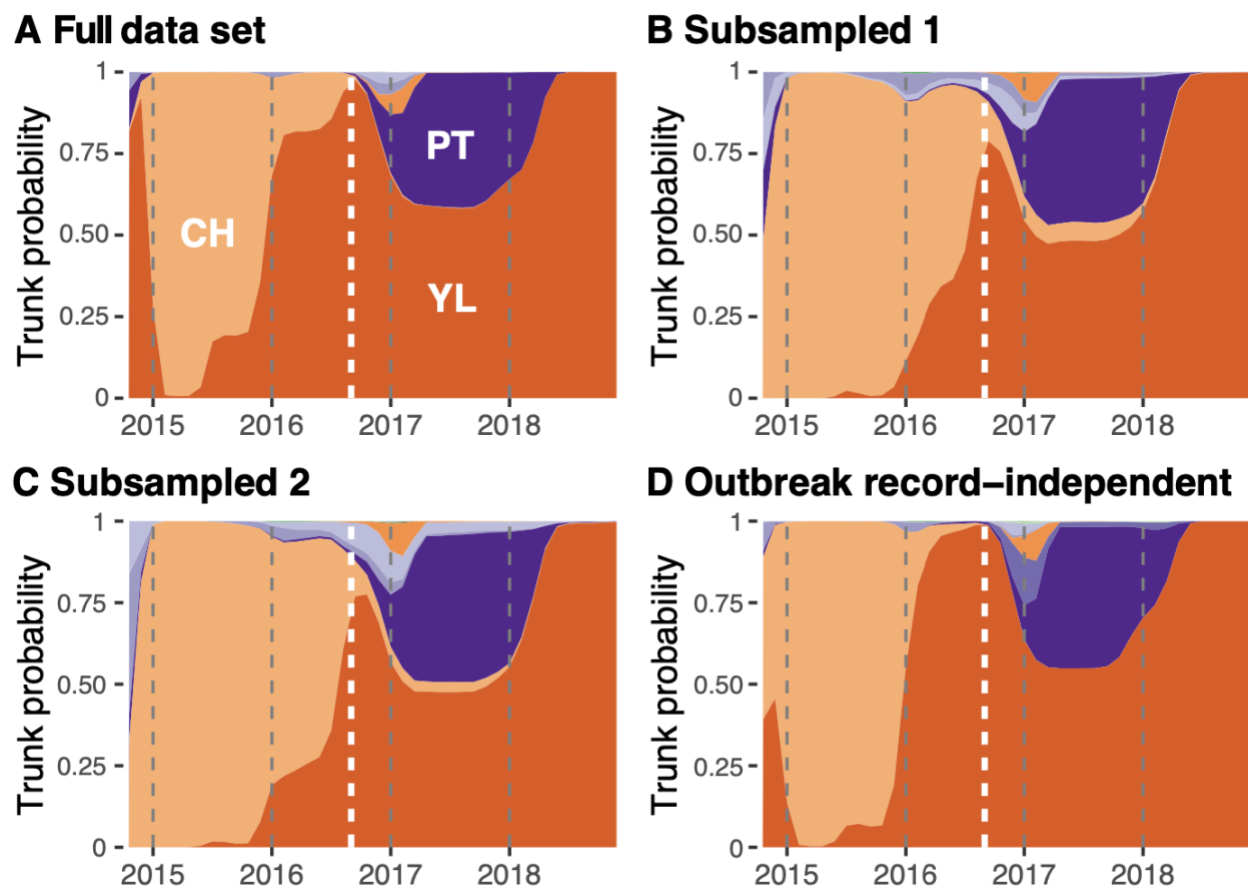

790

791

792 **Supplementary figure 6.** Inferred trunk locations of Taiwan clade 2.3.4.4c phylogenies through time in  
793 different genetic data sets (A-C) or with a simple geographic state assignment scheme (D). The proportions  
794 at each time point indicate the posterior support for viruses circulating in a particular county/city  
795 occupying the trunk of the tree. The areas are colored using the same scheme as Figure 2. The white  
796 dashed lines indicate the boundary of T1 and T2, September 1st, 2016.

797

798

799

800

801

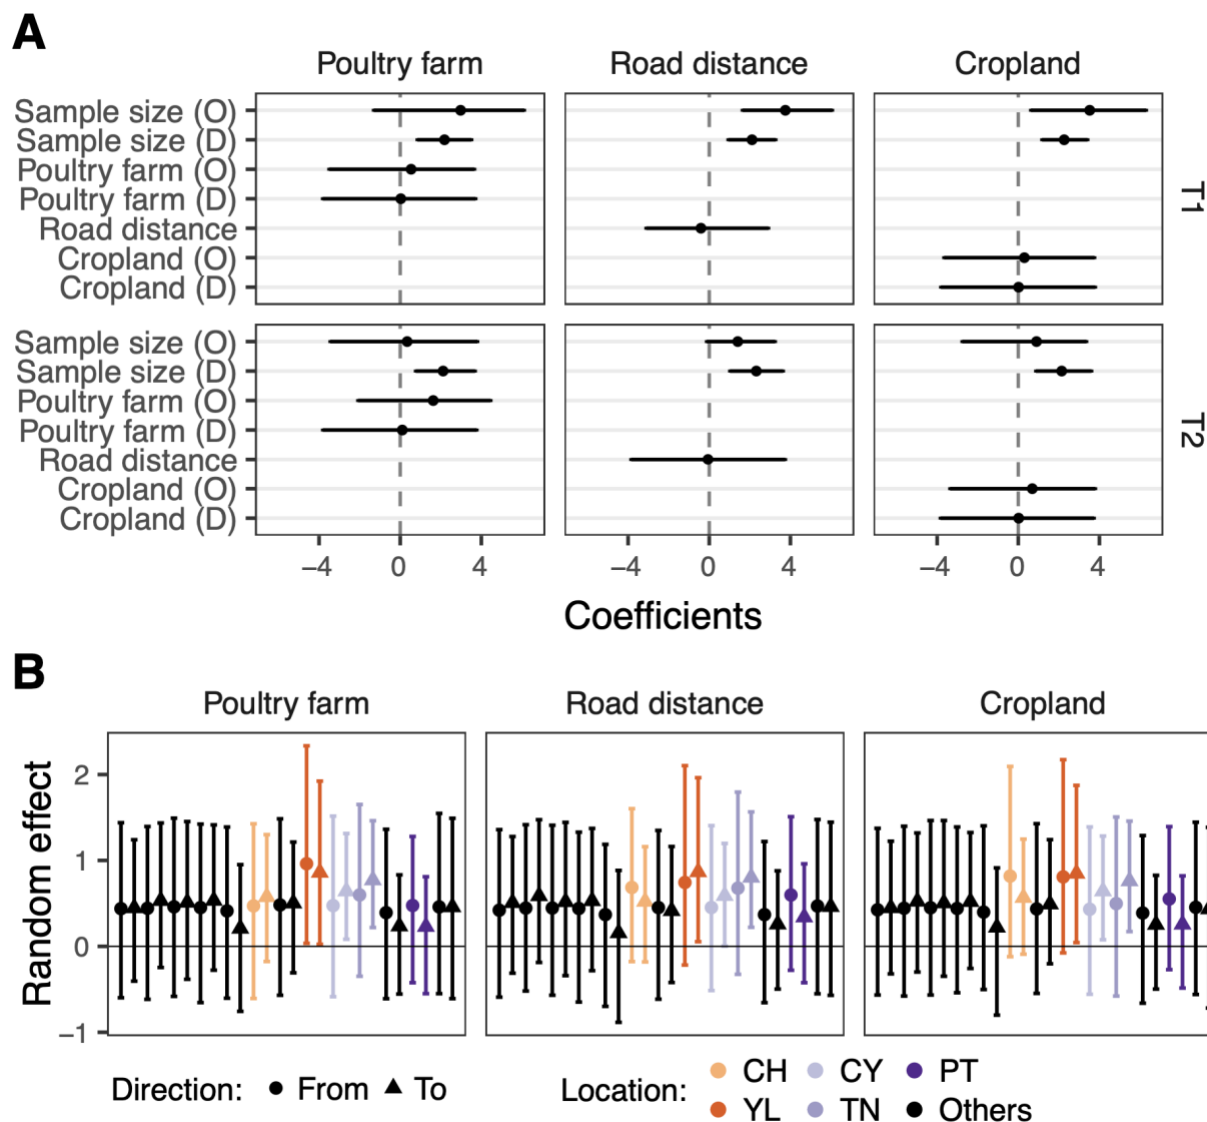

802

803

804 **Supplementary figure 7.** Evaluating predictors in reduced models of time-heterogeneous phylogenetic

805 GLM. (A) The conditional effect sizes in models containing respective predictors. The predictor names

806 are denoted by O in parentheses for origin and D for destination. (B) Location-specific random effects in

807 the three models, with high incidence areas colored. The estimates are in log space and presented as mean

808 with 95% HPD interval.

809

810

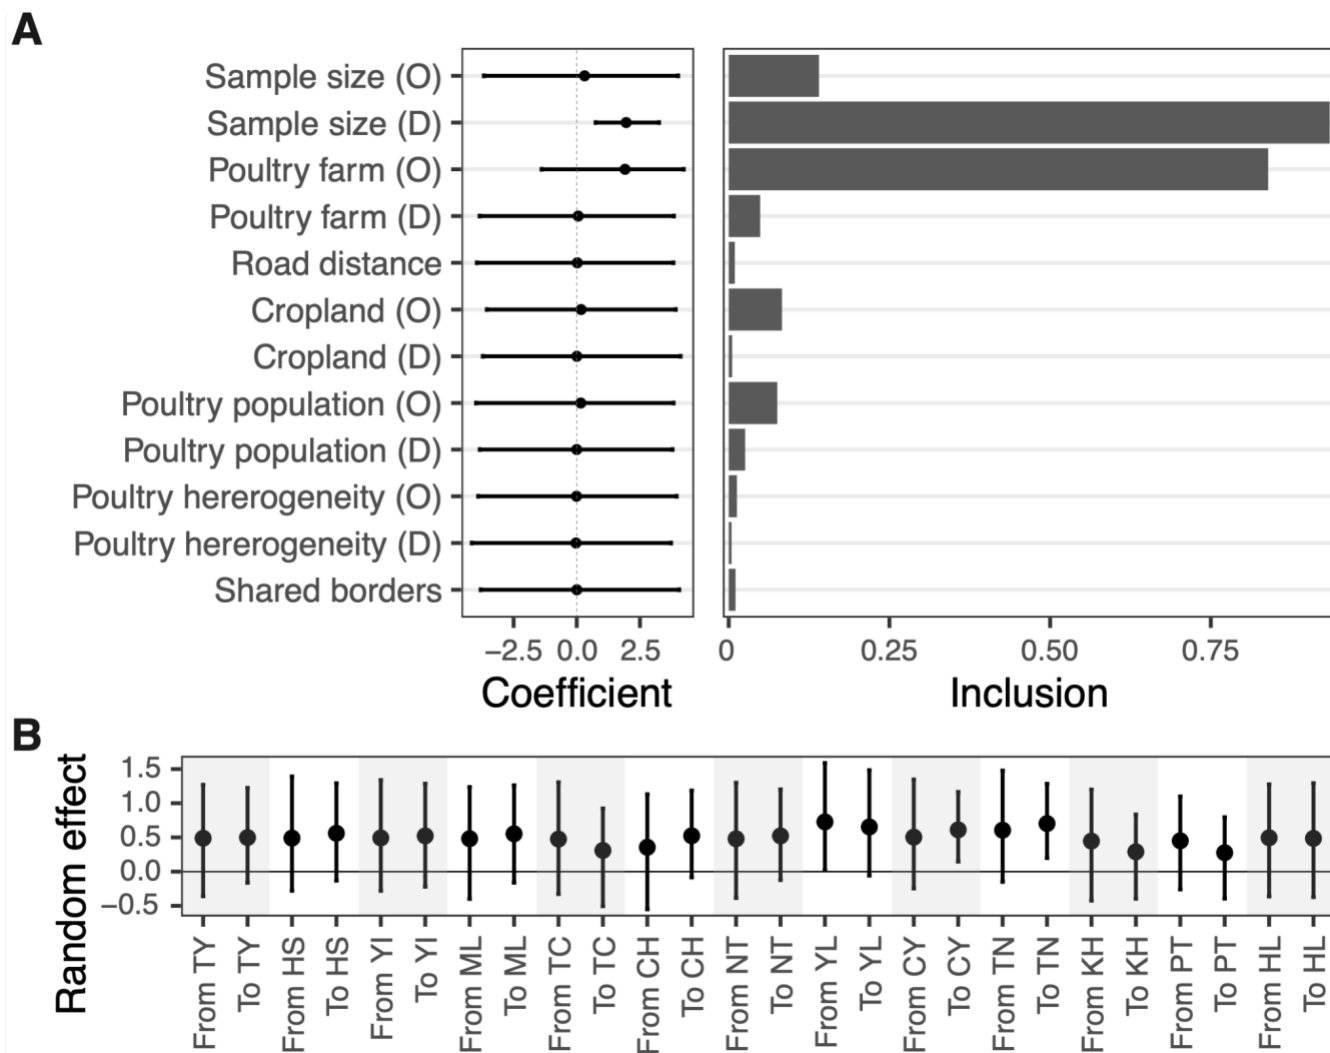

811

812 **Supplementary figure 8.** Evaluating predictors in a time-homogeneous model. (A) The conditional effect  
 813 sizes and the inclusion probabilities of predictors estimated by the conventional phylogenetic GLM  
 814 models. The predictor names are denoted by O in parentheses for origin and D for destination. (B)  
 815 Location-specific random effects in the GLM model. The estimates are in log space and presented as mean  
 816 with 95% HPD interval.

817

818

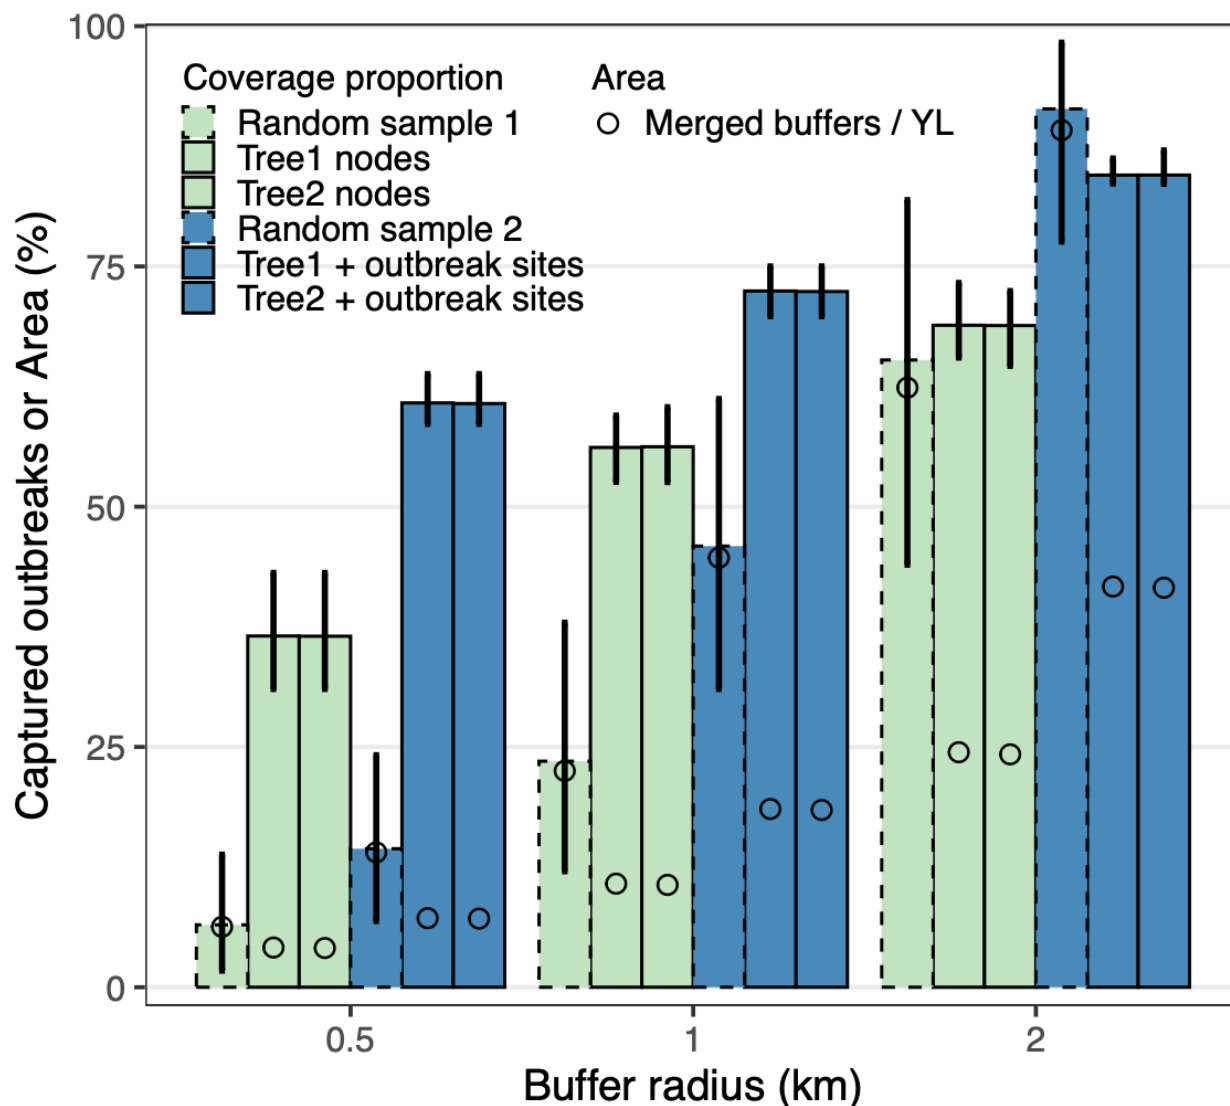

819

820

821 **Supplementary figure 9.** Impact of buffer radius on evaluating the re-emergence of new outbreaks in  
 822 county YL. The estimated locations of tree nodes using the continuous phylogenetic method during T2,  
 823 combined with or without contemporary outbreak sites, served as central points to create buffers with  
 824 different radius distances on the map. The proportion of new outbreak sites covered by the buffer areas  
 825 was calculated for each posterior tree. These outbreak sites were reported between 2019 and 2022, after  
 826 the latest available genetic data. Null models were created by randomly distributing sites in YL with the  
 827 same number of tree nodes (Random sample 1, green) or tree nodes plus outbreak sites (Random sample

828 2, blue). The bars show the mean values of two parallel continuous phylogeographic analyses each with  
829 1000 posterior trees, and null models. Error bars indicate 95% credible intervals. The open circle in each  
830 bar represents the ratio of the area of merged buffers to the area of YL.

831

832

833

834

835

836

837

838

839

840

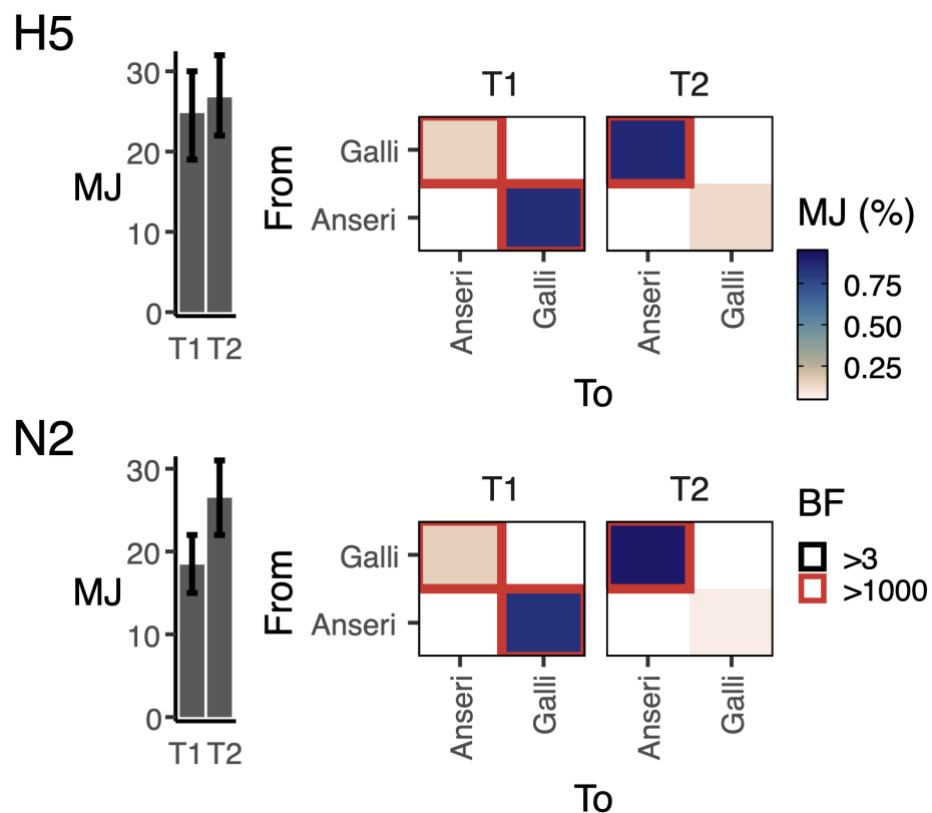

841

842

843 **Supplementary figure 10.** Diffusion between host groups. Markov jumps (MJ) and Bayes factors (BF)  
844 were estimated by the discrete phylogenetic method. Total MJ counts in different time spans are shown  
845 on the left. The heatmaps present the jumps as proportions to the total counts. Anseri refers to the  
846 Anseriformes genus and Galli refers to the Galliformes genus. Results based on both HA (H5) and NA  
847 (N2) are shown.

848

849

850

851

852

853



854 **Supplementary Table1.** Selection pressure for the surface proteins of H5 avian influenza lineages in  
 855 Taiwan.

|                                            | H5                     |                           | N2                     |                        |
|--------------------------------------------|------------------------|---------------------------|------------------------|------------------------|
|                                            | GsGd<br>Clade 2.3.4.4  | North<br>American         | GsGd<br>Clade 2.3.4.4  | North<br>American      |
| dN/dS ( $\omega$ )<br>(95% CI)             | 0.204<br>(0.180-0.230) | 0.207<br>(0.174-0.245)    | 0.355<br>(0.316-0.397) | 0.233<br>(0.192-0.279) |
| Pervasive positively<br>selected sites     | 131                    | -                         | 77                     | -                      |
| Episodic positively<br>selected sites      | 131, 387, 403, 545     | 17, 102, 137,<br>155, 317 | 77, 313, 416, 439      | 5, 6, 261, 307         |
| No. of fixed sites<br>among selected sites | 0                      | 0                         | 0                      | 0                      |

856

857

858

859

860

861

862

863

864

865

866

867

868

869

870

871  
872

**Supplementary Table 2.** List of database accession numbers from GenBank and GISAID.

|    | accession no. | strain name                             |
|----|---------------|-----------------------------------------|
| 1  | MW333030      | duck/Nantou/15A03445-11-20T/2015        |
| 2  | MW333038      | chicken/Changhua/15010120-1/2015        |
| 3  | MW333046      | chicken/Changhua/15010288/2015          |
| 4  | MW333054      | chicken/Changhua/15010324-2/2015        |
| 5  | MW333062      | chicken/Changhua/15010361-1/2015        |
| 6  | MW333070      | chicken/Changhua/15010362-2/2015        |
| 7  | MW333078      | chicken/Changhua/15010363-2/2015        |
| 8  | MW333086      | chicken/Changhua/15040036-1/2015        |
| 9  | MW333094      | chicken/Changhua/15040043-1/2015        |
| 10 | MW333102      | chicken/Changhua/15040037-2/2015        |
| 11 | MW333110      | chicken/Changhua/15040042/2015          |
| 12 | MW333118      | chicken/Changhua/15050013-1/2015        |
| 13 | MW333126      | chicken/Changhua/15050038-1/2015        |
| 14 | MW333134      | chicken/Changhua/15060027-2/2015        |
| 15 | MW333142      | chicken/Changhua/15060029/2015          |
| 16 | MW333150      | chicken/Changhua/15060037-1/2015        |
| 17 | MW333158      | chicken/Changhua/15120008/2015          |
| 18 | MW333166      | chicken/Changhua/16010060-2/2016        |
| 19 | MW333174      | chicken/Changhua/16020042-2/2016        |
| 20 | MW333182      | chicken/Changhua/17030063-1/2017        |
| 21 | MW333190      | chicken/Changhua/17060006/2017          |
| 22 | MW333198      | chicken/Changhua/18010011-1/2018        |
| 23 | MW333206      | chicken/Changhua/18040008-1/2018        |
| 24 | MW333214      | chicken/Chiayi/15010287-2/2015          |
| 25 | MW333222      | chicken/Chiayi/15010409-2/2015          |
| 26 | MW333230      | chicken/Chiayi/15010454-1/2015          |
| 27 | MW333238      | chicken/Chiayi/17030059-2/2017          |
| 28 | MW333246      | chicken/Chiayi/17040009-2/2017          |
| 29 | MW333254      | chicken/Chiayi/18120003-1/2018          |
| 30 | MW333262      | chicken/Hsinchu/16080004-2/2016         |
| 31 | MW333270      | chicken/Kaohsiung/16010047/2016         |
| 32 | MW333278      | chicken/Kaohsiung/16020017-2/2016       |
| 33 | MW333294      | chicken/Kaohsiung/16070003/2016         |
| 34 | MW333302      | chicken/Kaohsiung/16120012/2016         |
| 35 | MW333310      | chicken/Kaohsiung/16120034/2016         |
| 36 | MW333326      | chicken/Kaohsiung/17030023/2017         |
| 37 | MW333334      | chicken/Kaohsiung/17040006-2/2017       |
| 38 | MW333342      | chicken/Kaohsiung/17040007/2017         |
| 39 | MW333350      | chicken/Kaohsiung/17100002/2017         |
| 40 | MW333358      | chicken/Kaohsiung/18080004-1/2018       |
| 41 | MW333366      | chicken/Kaohsiung/18080004-2/2018       |
| 42 | MW333374      | chicken/Miaoli/15010421-1/2015          |
| 43 | MW333382      | chicken/Miaoli/18040011-1/2018          |
| 44 | MW333390      | chicken/Nantou/16110023-1/2016          |
| 45 | MW333398      | chicken/New_Taipei_City/16110019-1/2016 |
| 46 | MW333406      | chicken/New_Taipei_City/16110020-2/2016 |
| 47 | MW333414      | chicken/New_Taipei_City/17040002-2/2017 |
| 48 | MW333422      | chicken/New_Taipei_City/17050004-2/2017 |
| 49 | MW333430      | chicken/New_Taipei_City/17090001/2017   |
| 50 | MW333454      | chicken/New_Taipei_City/18010021-3/2018 |
| 51 | MW333462      | chicken/Pingtung/15010402/2015          |
| 52 | MW333470      | chicken/Pingtung/15050006-1/2015        |
| 53 | MW333478      | chicken/Pingtung/16020009-3/2016        |
| 54 | MW333486      | chicken/Pingtung/18010017-1/2018        |
| 55 | MW333494      | chicken/Pingtung/18010019-2/2018        |
| 56 | MW333502      | chicken/Pingtung/18020015-1/2018        |
| 57 | MW333510      | chicken/Pingtung/18050006-1/2018        |
| 58 | MW333518      | chicken/Pingtung/18080001-1/2018        |
| 59 | MW333526      | chicken/Taichung/15010399/2015          |
| 60 | MW333534      | chicken/Taichung/16040032-3/2016        |
| 61 | MW333542      | chicken/Taichung/16050044-2/2016        |
| 62 | MW333550      | chicken/Taichung/16110017-3/2016        |
| 63 | MW333558      | chicken/Tainan/15020214/2015            |
| 64 | MW333566      | chicken/Tainan/16040035-1/2016          |
| 65 | MW333574      | chicken/Tainan/17030058-1/2017          |
| 66 | MW333582      | chicken/Tainan/18040014-2/2018          |

---

|     |          |                                     |
|-----|----------|-------------------------------------|
| 67  | MW333590 | chicken/Taipei_City/17090004/2017   |
| 68  | MW333598 | chicken/Taipei_City/18010007-3/2018 |
| 69  | MW333606 | chicken/Taipei_City/18010008-3/2018 |
| 70  | MW333614 | chicken/Taipei_City/18050007-1/2018 |
| 71  | MW333622 | chicken/Taipei_City/18050010-8/2018 |
| 72  | MW333646 | chicken/Taipei/16120021/2016        |
| 73  | MW333654 | chicken/Taipei/17050005-1/2017      |
| 74  | MW333662 | chicken/Taipei/17050006-2/2017      |
| 75  | MW333686 | chicken/Taipei/17050009-3/2017      |
| 76  | MW333694 | chicken/Yunlin/15020048-1/2015      |
| 77  | MW333702 | chicken/Yunlin/15040002-2/2015      |
| 78  | MW333710 | chicken/Yunlin/15040027/2015        |
| 79  | MW333718 | chicken/Yunlin/15050012/2015        |
| 80  | MW333726 | chicken/Yunlin/15050037-2/2015      |
| 81  | MW333734 | chicken/Yunlin/15050039-2/2015      |
| 82  | MW333742 | chicken/Yunlin/15060014-1/2015      |
| 83  | MW333750 | chicken/Yunlin/15080024/2015        |
| 84  | MW333758 | chicken/Yunlin/16010001-1/2016      |
| 85  | MW333766 | chicken/Yunlin/16010008-1/2016      |
| 86  | MW333774 | chicken/Yunlin/16020038/2016        |
| 87  | MW333782 | chicken/Yunlin/16050053/2016        |
| 88  | MW333790 | chicken/Yunlin/17010001/2017        |
| 89  | MW333798 | chicken/Yunlin/17010014/2017        |
| 90  | MW333806 | chicken/Yunlin/17020033-2/2017      |
| 91  | MW333814 | chicken/Yunlin/17020094-1/2017      |
| 92  | MW333822 | chicken/Yunlin/17020095-2/2017      |
| 93  | MW333830 | chicken/Yunlin/17030001-1/2017      |
| 94  | MW333838 | chicken/Yunlin/17030007-1/2017      |
| 95  | MW333846 | chicken/Yunlin/17030010-1/2017      |
| 96  | MW333854 | chicken/Yunlin/17030014-1/2017      |
| 97  | MW333862 | chicken/Yunlin/17030020-2/2017      |
| 98  | MW333870 | chicken/Yunlin/17030021-1/2017      |
| 99  | MW333878 | chicken/Yunlin/17030032-2/2017      |
| 100 | MW333886 | chicken/Yunlin/17030065-2/2017      |
| 101 | MW333894 | chicken/Yunlin/17040003-1/2017      |
| 102 | MW333902 | chicken/Yunlin/17040004-2/2017      |
| 103 | MW333910 | chicken/Yunlin/17040005-1/2017      |
| 104 | MW333918 | chicken/Yunlin/17040010-1/2017      |
| 105 | MW333926 | chicken/Yunlin/17040011-1/2017      |
| 106 | MW333934 | chicken/Yunlin/17040012-1/2017      |
| 107 | MW333942 | chicken/Yunlin/17060019/2017        |
| 108 | MW333950 | chicken/Yunlin/17070010/2017        |
| 109 | MW333958 | chicken/Yunlin/18010001-2/2018      |
| 110 | MW333966 | chicken/Yunlin/18010003-3/2018      |
| 111 | MW333974 | chicken/Yunlin/18010023-1/2018      |
| 112 | MW333982 | chicken/Yunlin/18010024-2/2018      |
| 113 | MW333990 | chicken/Yunlin/18020003-2/2018      |
| 114 | MW333998 | chicken/Yunlin/18020004-1/2018      |
| 115 | MW334006 | chicken/Yunlin/18020005-2/2018      |
| 116 | MW334014 | chicken/Yunlin/18020008-2/2018      |
| 117 | MW334022 | chicken/Yunlin/18020021-1/2018      |
| 118 | MW334030 | chicken/Yunlin/18030002-1/2018      |
| 119 | MW334038 | chicken/Yunlin/18040006-3/2018      |
| 120 | MW334046 | chicken/Yunlin/18050013-1/2018      |
| 121 | MW334054 | chicken/Yunlin/18060001-2/2018      |
| 122 | MW334062 | chicken/Yunlin/18070003-3/2018      |
| 123 | MW334070 | chicken/Yunlin/18080006-1/2018      |
| 124 | MW334078 | duck/Changhua/15A03431-1-20T/2015   |
| 125 | MW334086 | duck/Changhua/15A03473-1-20T/2015   |
| 126 | MW334094 | duck/Chiayi/15080023/2015           |
| 127 | MW334102 | duck/Hsinchu/15020216/2015          |
| 128 | MW334110 | duck/Kaohsiung/15010213/2015        |
| 129 | MW334118 | duck/Nantou/15A3437/2015            |
| 130 | MW334126 | duck/Nantou/17A0243/2017            |
| 131 | MW334134 | duck/Pingtung/15010145/2015         |
| 132 | MW334142 | duck/Pingtung/15010157-1/2015       |
| 133 | MW334150 | duck/Pingtung/15010180/2015         |
| 134 | MW334158 | duck/Pingtung/15010444/2015         |
| 135 | MW334166 | duck/Pingtung/15010461-1/2015       |
| 136 | MW334174 | duck/Pingtung/15120006/2015         |

---

---

|     |          |                                    |
|-----|----------|------------------------------------|
| 137 | MW334182 | duck/Pingtung/15A03399-1-10T/2015  |
| 138 | MW334190 | duck/Pingtung/17A00408-1-10T/2017  |
| 139 | MW334198 | duck/Pingtung/17A0160/2017         |
| 140 | MW334206 | duck/Pingtung/18A00003-11-20T/2018 |
| 141 | MW334214 | duck/Pingtung/18A00076-11-20T/2018 |
| 142 | MW334222 | duck/Pingtung/18X00077/2018        |
| 143 | MW334230 | duck/Taichung/15010400-1/2015      |
| 144 | MW334238 | duck/Tainan/15010403/2015          |
| 145 | MW334262 | duck/Taoyuan/16010023-1/2016       |
| 146 | MW334270 | duck/Yilan/17A0092/2017            |
| 147 | MW334278 | duck/Yunlin/15010115-2/2015        |
| 148 | MW334286 | duck/Yunlin/15010244-1/2015        |
| 149 | MW334294 | duck/Yunlin/15010277/2015          |
| 150 | MW334302 | duck/Yunlin/15010310-4/2015        |
| 151 | MW334310 | duck/Yunlin/15010318-2/2015        |
| 152 | MW334318 | duck/Yunlin/15010369-1/2015        |
| 153 | MW334326 | duck/Yunlin/15010458-1/2015        |
| 154 | MW334334 | duck/Yunlin/15010538/2015          |
| 155 | MW334342 | duck/Yunlin/15070002-2/2015        |
| 156 | MW334350 | duck/Yunlin/15A03403-1-20T/2015    |
| 157 | MW334358 | duck/Yunlin/15A04883-1-10T/2015    |
| 158 | MW334366 | duck/Yunlin/15A5019/2015           |
| 159 | MW334374 | duck/Yunlin/17110001/2017          |
| 160 | MW334382 | duck/Yunlin/17A0086/2017           |
| 161 | MW334390 | duck/Yunlin/17A0686/2017           |
| 162 | MW334398 | duck/Yunlin/18010004-2/2018        |
| 163 | MW334406 | duck/Yunlin/18060006-1/2018        |
| 164 | MW334414 | duck/Yunlin/18060007-3/2018        |
| 165 | MW334422 | duck/Yunlin/18X00007-3/2018        |
| 166 | MW334446 | goose/Changhua/15040008/2015       |
| 167 | MW334454 | goose/Chiayi/15010008-3/2015       |
| 168 | MW334462 | goose/Chiayi/15010016-1/2015       |
| 169 | MW334470 | goose/Chiayi/15020022/2015         |
| 170 | MW334478 | goose/Chiayi/16010017-2/2016       |
| 171 | MW334486 | goose/Chiayi/16040003-1/2016       |
| 172 | MW334494 | goose/Chiayi/16040005/2016         |
| 173 | MW334502 | goose/Chiayi/16040007-1/2016       |
| 174 | MW334510 | goose/Chiayi/17020027-1/2017       |
| 175 | MW334518 | goose/Chiayi/17040014/2017         |
| 176 | MW334526 | goose/Chiayi/18010006/2018         |
| 177 | MW334534 | goose/Chiayi/18020002-2/2018       |
| 178 | MW334566 | goose/Pingtung/15010007-4/2015     |
| 179 | MW334574 | goose/Pingtung/15010037-1/2015     |
| 180 | MW334582 | goose/Pingtung/15050014/2015       |
| 181 | MW334590 | goose/Pingtung/16010061/2016       |
| 182 | MW334598 | goose/Tainan/16010031-2/2016       |
| 183 | MW334606 | goose/Tainan/16020041-2/2016       |
| 184 | MW334614 | goose/Tainan/16040018-1/2016       |
| 185 | MW334622 | goose/Tainan/16070002/2016         |
| 186 | MW334630 | goose/Tainan/17030022-1/2017       |
| 187 | MW334638 | goose/Tainan/17030024-1/2017       |
| 188 | MW334646 | goose/Tainan/18010022-1/2018       |
| 189 | MW334654 | goose/Tainan/18050014-1/2018       |
| 190 | MW334662 | goose/Taoyuan/15010041/2015        |
| 191 | MW334670 | goose/Taoyuan/18120002-2/2018      |
| 192 | MW334678 | goose/Yunlin/15010005/2015         |
| 193 | MW334686 | goose/Yunlin/15010009-1/2015       |
| 194 | MW334694 | goose/Yunlin/15010010-2/2015       |
| 195 | MW334702 | goose/Yunlin/15010011-1/2015       |
| 196 | MW334710 | goose/Yunlin/15010029-1/2015       |
| 197 | MW334718 | goose/Yunlin/15040040/2015         |
| 198 | MW334726 | goose/Yunlin/16020008-4/2016       |
| 199 | MW334734 | goose/Yunlin/16020011-1/2016       |
| 200 | MW334742 | goose/Yunlin/16030042-2/2016       |
| 201 | MW334750 | goose/Yunlin/16040002-2/2016       |
| 202 | MW334758 | goose/Yunlin/17100005/2017         |
| 203 | MW334782 | goose/Yunlin/18030020-3/2018       |
| 204 | MW334790 | goose/Yunlin/18040002-3/2018       |
| 205 | MW334798 | goose/Yunlin/18040018-2/2018       |
| 206 | MW334806 | goose/Yunlin/18050003-2/2018       |

---

---

|     |           |                                       |     |
|-----|-----------|---------------------------------------|-----|
| 207 | MW334814  | goose/Yunlin/18090002-3/2018          | 873 |
| 208 | MW334822  | goose/Yunlin/18090006-1/2018          |     |
| 209 | MW334830  | goose/Yunlin/18110002-3/2018          |     |
| 210 | MW334854  | turkey/Changhua/16010011-1/2016       |     |
| 211 | MW334862  | turkey/Chiayi/17020086-2/2017         |     |
| 212 | MW334870  | turkey/Chiayi/17020092-2/2017         |     |
| 213 | MW334878  | turkey/Chiayi/18010013-3/2018         |     |
| 214 | MW334886  | turkey/Yunlin/15030069-1/2015         |     |
| 215 | MW334894  | turkey/Yunlin/15060049-1/2015         |     |
| 216 | MW334902  | turkey/Yunlin/18020020-2/2018         |     |
| 217 | MW334910  | turkey/Yunlin/18070001-2/2018         |     |
| 218 | MW334918  | turkey/Yunlin/18090003-3/2018         |     |
| 219 | MW334926  | turkey/Yunlin/18110001-3/2018         |     |
| 220 | MW334934  | turkey/Yunlin/18120005-2/2018         |     |
| 221 | EPI588952 | goose/Taiwan/a015/2015                |     |
| 222 | EPI588960 | duck/Taiwan/a043/2015                 |     |
| 223 | EPI588976 | duck/Taiwan/a068/2015                 |     |
| 224 | KT388444  | goose/Taiwan/TNC1/2015                |     |
| 225 | KT388572  | goose/Taiwan/TNO3/2015                |     |
| 226 | KU646901  | goose/Taiwan/01038/2015               |     |
| 227 | KU646917  | duck/Taiwan/A3400/2015                |     |
| 228 | KU646925  | goose/Taiwan/01019/2015               |     |
| 229 | KU646933  | goose/Taiwan/01026/2015               |     |
| 230 | KU646941  | goose/Taiwan/01039/2015               |     |
| 231 | KU646861  | duck/Taiwan/01006/2015                |     |
| 232 | KU646869  | goose/Taiwan/01022/2015               |     |
| 233 | KU646877  | goose/Taiwan/01023/2015               |     |
| 234 | KU646885  | goose/Taiwan/01031/2015               |     |
| 235 | KU646893  | goose/Taiwan/01040/2015               |     |
| 236 | EPI961922 | chicken/Taiwan/u7/2016                |     |
| 237 | EPI961933 | chicken/Taiwan/x37/2016               |     |
| 238 | KP714479  | goose/Taiwan/01-003/2015              |     |
| 239 | KP714480  | goose/Taiwan/01-004/2015              |     |
| 240 | KP714481  | goose/Taiwan/01-042/2015              |     |
| 241 | MW334254  | duck/Tainan/16010024-1/2016           |     |
| 242 | MW333318  | chicken/Kaohsiung/16MB0889/2016       |     |
| 243 | MW333638  | chicken/Taipei/16060023-1/2016        |     |
| 244 | MW333670  | chicken/Taipei/17050007-2/2017        |     |
| 245 | MW333438  | chicken/New_Taipei_City/17090002/2017 |     |
| 246 | KU646909  | chicken/Taiwan/01174/2015             |     |
| 247 | MW334558  | goose/Chiayi/18020014-3/2018          |     |
| 248 | MW334766  | goose/Yunlin/18030020-1/2018          |     |
| 249 | MN988773  | chicken/Taiwan/A3/2019                |     |
| 250 | MN988805  | chicken/Taiwan/D9/2019                |     |
| 251 | KT388452  | goose/Taiwan/TNC2/2015                |     |
| 252 | KT388476  | goose/Taiwan/TNC5/2015                |     |

---

874

875
